# Supplementary material for: The unique gut microbiome of giant pandas involved in protein metabolism contributes to the host’s dietary adaption to bamboo
Source: PubMed Central journal article supplement (PMC10424351; doi:10.1186/s40168-023-01603-0), 2023-08-14
Supplement: 40168_2023_1603_MOESM1_ESM.pdf [file 40168_2023_1603_MOESM1_ESM.pdf]

Figure S1. The top 15 most abundant genera in the giant panda gut.

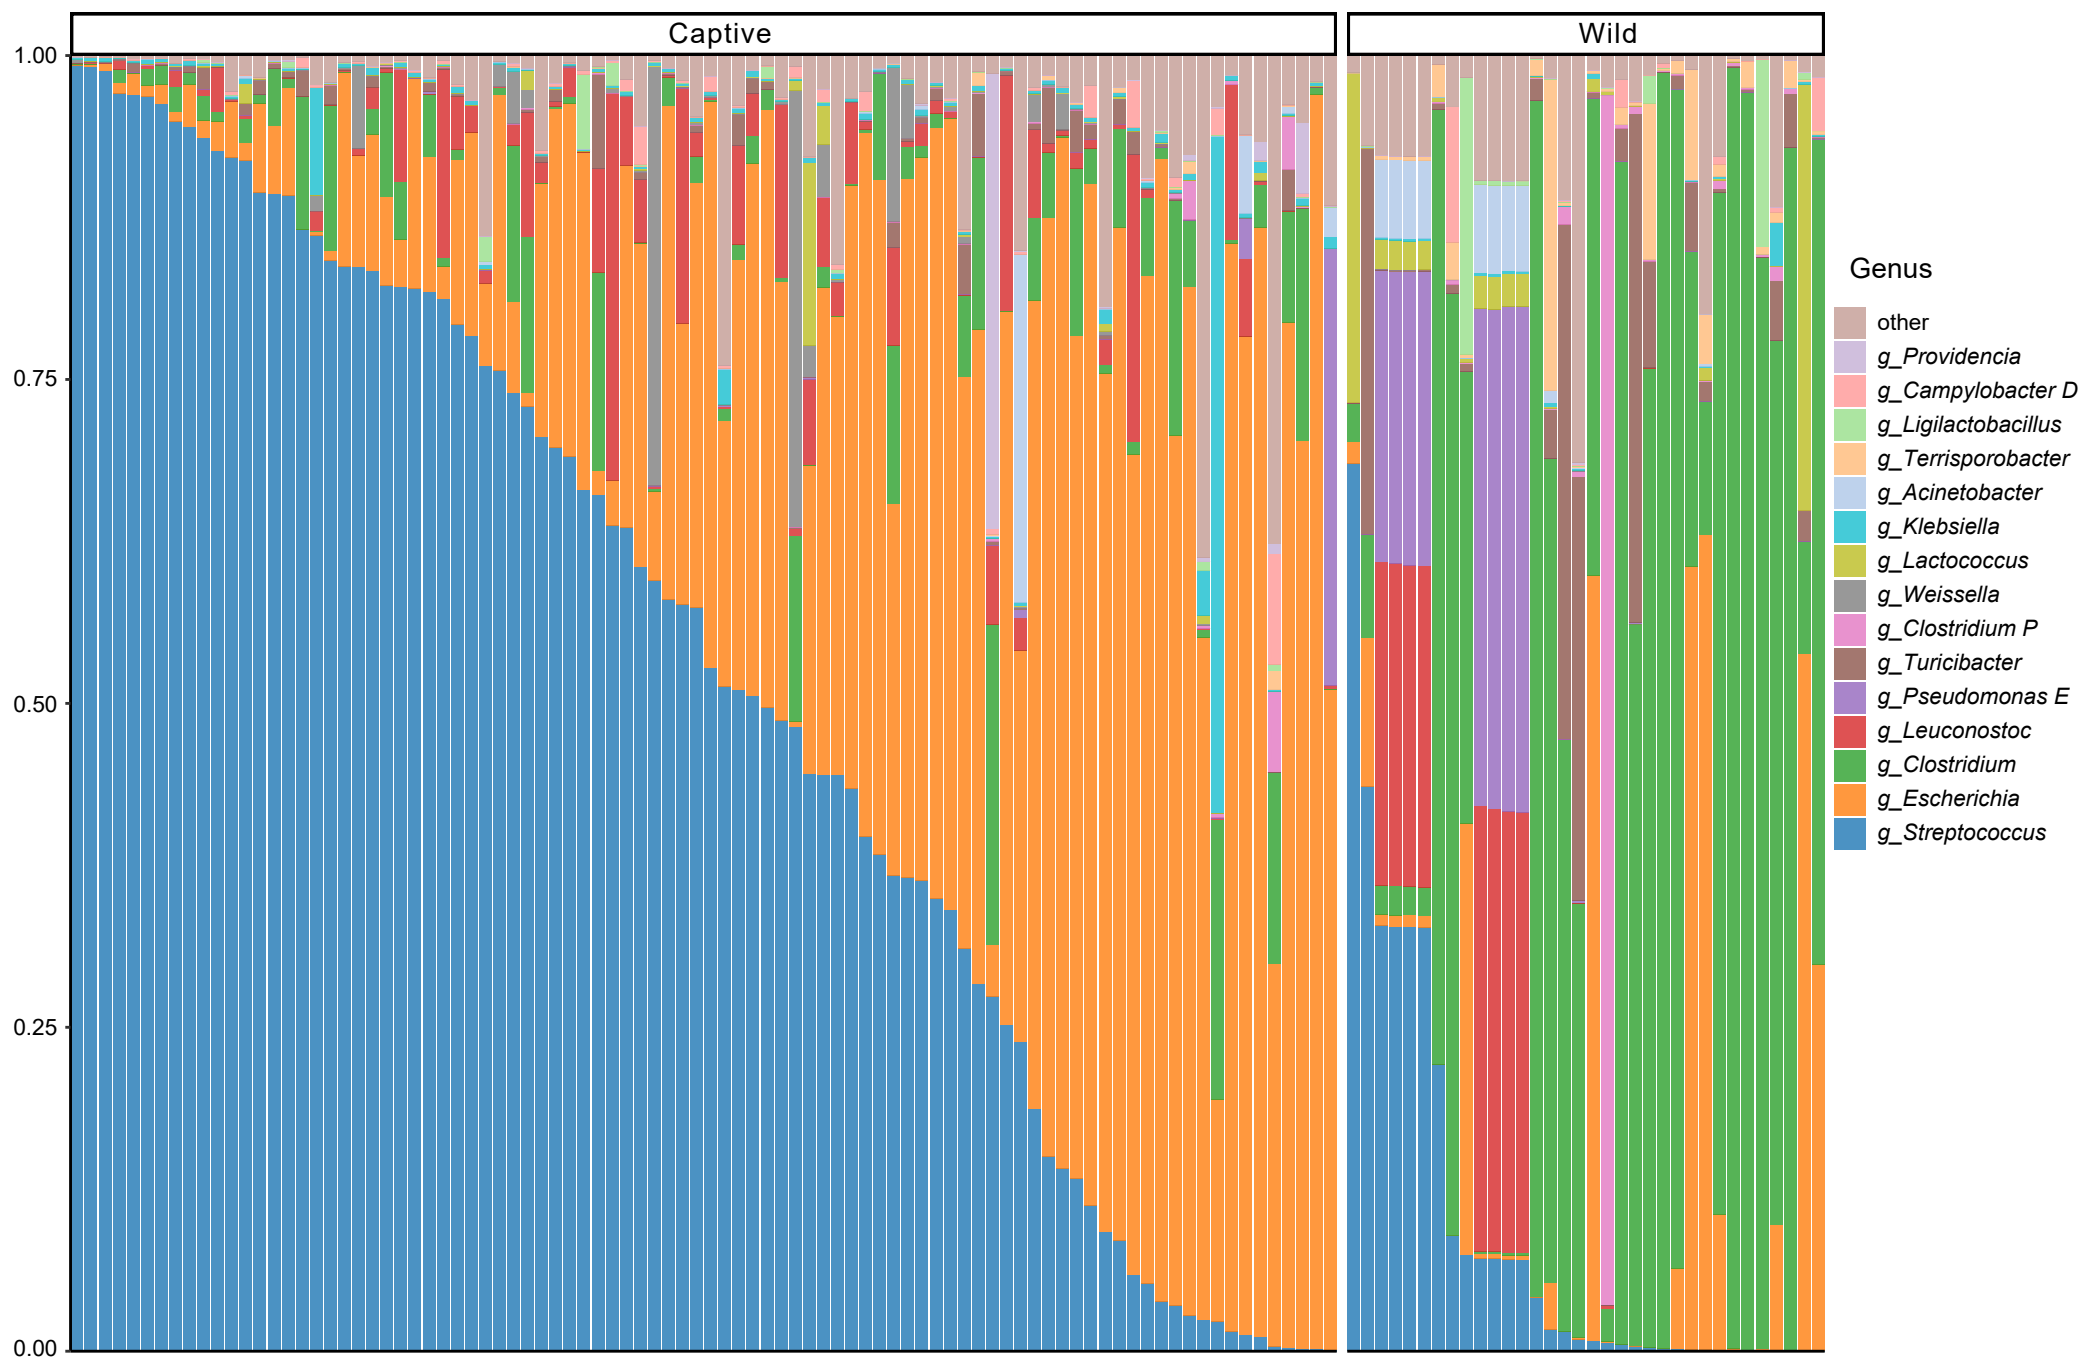

Figure S2. The top 15 most abundant MAGs in the giant panda gut

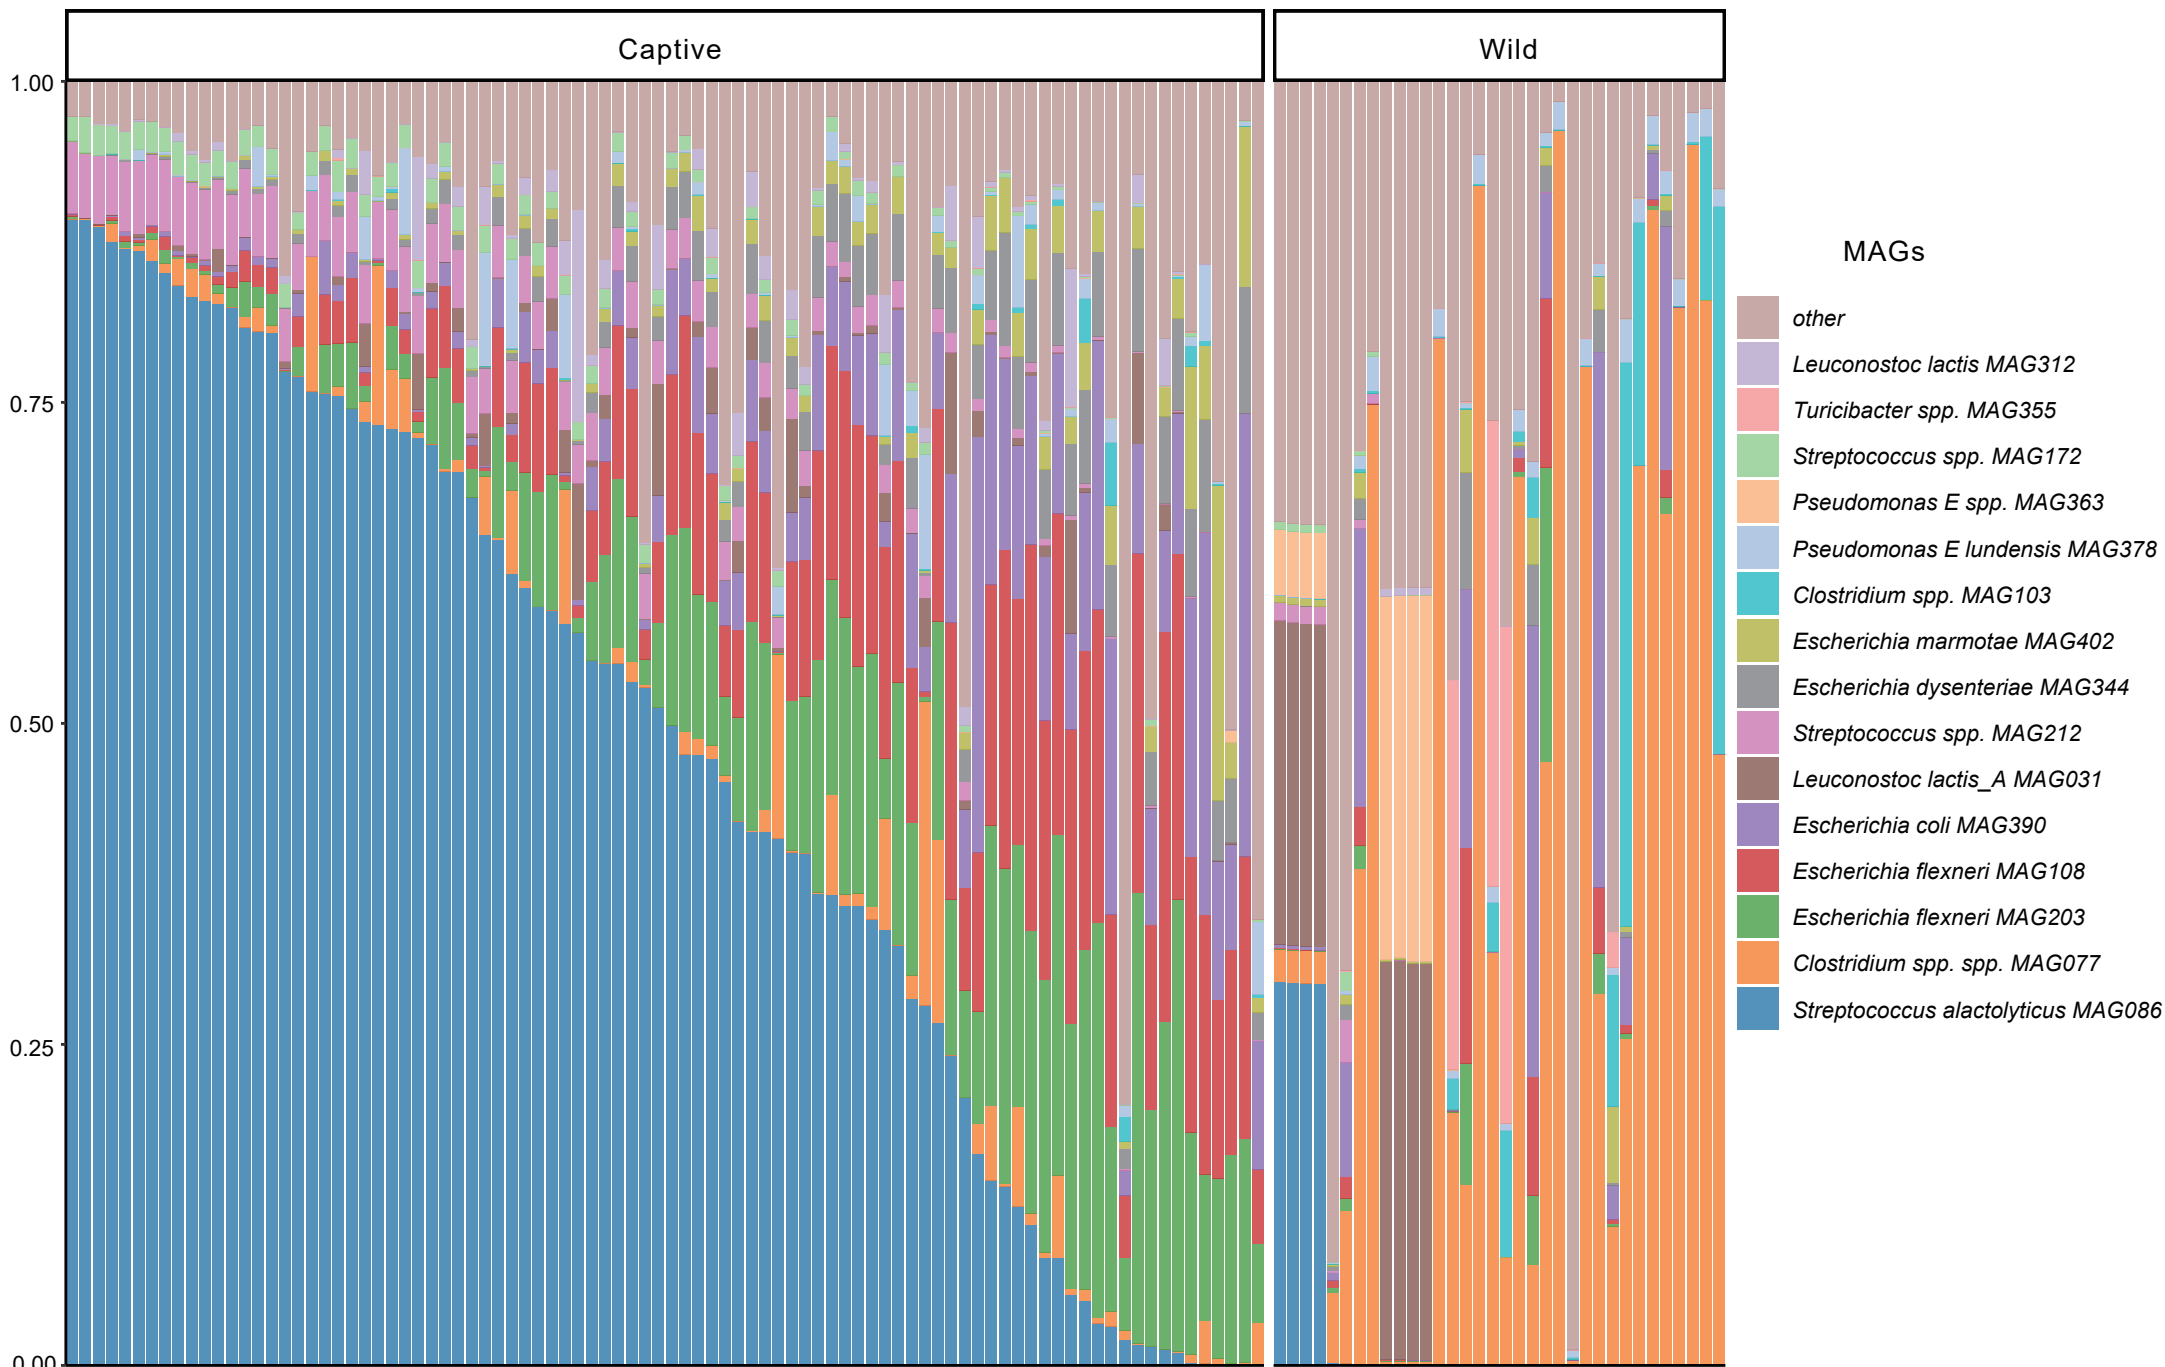

**Figure S3.** Composition of the top 10 species revealed by metagenomic abundance and metatranscriptomic expression at the species level.

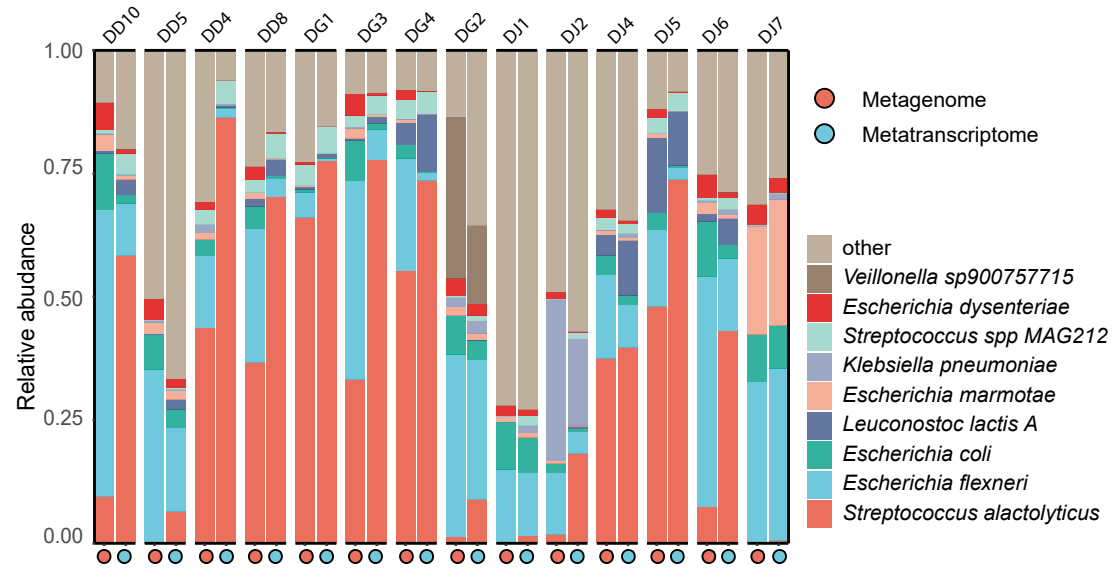

**Table S1. Summary of sequenced and downloaded samples**

| Sample ID    | Type of giant panda | Sex  | Read length (bp) | # of reads | Sequencing depth (bp) | Accession Number |
|--------------|---------------------|------|------------------|------------|-----------------------|------------------|
| P1-160720-B  | Captive             | Male | 100              | 146362573  | 29272514600           | SRR7533009       |
| P1-160720-V  | Captive             | Male | 100              | 102209357  | 20441871400           | SRR7533001       |
| P1-160815-B1 | Captive             | Male | 100              | 81148861   | 16229772200           | SRR7532977       |
| P1-160815-B2 | Captive             | Male | 100              | 60585776   | 12117155200           | SRR7532976       |
| P1-160815-V  | Captive             | Male | 100              | 173092735  | 34618547000           | SRR7533000       |
| P1-160817-B1 | Captive             | Male | 100              | 94765687   | 18953137400           | SRR7532983       |
| P1-160817-B2 | Captive             | Male | 100              | 30568063   | 6113612600            | SRR7532982       |
| P1-161107-B1 | Captive             | Male | 100              | 89960322   | 17992064400           | SRR7532888       |
| P1-161107-B2 | Captive             | Male | 100              | 70956218   | 14191243600           | SRR7532889       |
| P1-161107-V  | Captive             | Male | 100              | 156096424  | 31219284800           | SRR7533005       |
| P1-161120-B1 | Captive             | Male | 100              | 91927383   | 18385476600           | SRR7532892       |
| P1-161120-B2 | Captive             | Male | 100              | 74818570   | 14963714000           | SRR7532893       |
| P1-161120-V  | Captive             | Male | 100              | 88131620   | 17626324000           | SRR7533004       |
| P1-161215-B1 | Captive             | Male | 100              | 73274430   | 14654886000           | SRR7532884       |
| P1-161215-B2 | Captive             | Male | 100              | 85584870   | 17116974000           | SRR7532885       |
| P1-161215-V  | Captive             | Male | 100              | 147488597  | 29497719400           | SRR7533003       |
| P1-170115-B1 | Captive             | Male | 100              | 82702074   | 16540414800           | SRR7532914       |
| P1-170115-B2 | Captive             | Male | 100              | 66973659   | 13394731800           | SRR7532913       |
| P1-170115-V  | Captive             | Male | 100              | 136232416  | 27246483200           | SRR7533007       |
| P1-170215-B1 | Captive             | Male | 100              | 57780316   | 11556063200           | SRR7532910       |
| P1-170215-B2 | Captive             | Male | 100              | 112220534  | 22444106800           | SRR7532909       |
| P1-170215-V  | Captive             | Male | 100              | 163994614  | 32798922800           | SRR7533072       |
| P1-170315-B1 | Captive             | Male | 100              | 79812071   | 15962414200           | SRR7533066       |
| P1-170315-B2 | Captive             | Male | 100              | 64972193   | 12994438600           | SRR7533067       |
| P1-170315-V  | Captive             | Male | 100              | 151491991  | 30298398200           | SRR7533070       |
| P1-170416-B1 | Captive             | Male | 100              | 88887539   | 17777507800           | SRR7533030       |
| P1-170416-B2 | Captive             | Male | 100              | 86201466   | 17240293200           | SRR7533028       |
| P1-170416-V  | Captive             | Male | 100              | 150415063  | 30083012600           | SRR7532965       |
| P1-170515-B1 | Captive             | Male | 100              | 89729371   | 17945874200           | SRR7532989       |
| P1-170515-B2 | Captive             | Male | 100              | 78449261   | 15689852200           | SRR7532988       |
| P1-170515-V  | Captive             | Male | 100              | 164861581  | 32972316200           | SRR7532896       |
| P1-170616-B1 | Captive             | Male | 100              | 83439067   | 16687813400           | SRR7532932       |
| P1-170616-B2 | Captive             | Male | 100              | 97102354   | 19420470800           | SRR7532933       |
| P1-170616-V  | Captive             | Male | 100              | 112530775  | 22506155000           | SRR7532961       |
| P1-170716-B1 | Captive             | Male | 100              | 65067624   | 13013524800           | SRR7532929       |
| P1-170716-B2 | Captive             | Male | 100              | 47675401   | 9535080200            | SRR7532928       |
| P1-170716-B3 | Captive             | Male | 100              | 77712199   | 15542439800           | SRR7532923       |
| P1-170716-B4 | Captive             | Male | 100              | 103535477  | 20707095400           | SRR7532922       |
| P1-170716-V  | Captive             | Male | 100              | 112710202  | 22542040400           | SRR7532959       |

| Sample ID    | Type of giant panda | Sex    | Read length (bp) | # of reads | Sequencing depth (bp) | Accession Number |
|--------------|---------------------|--------|------------------|------------|-----------------------|------------------|
| P-160607-BV1 | Captive             | Miss   | 100              | 99623404   | 19924680800           | SRR7532973       |
| P-160607-BV2 | Captive             | Miss   | 100              | 67672216   | 13534443200           | SRR7532972       |
| P2-160720-B1 | Captive             | Female | 100              | 51128843   | 10225768600           | SRR7532975       |
| P2-160720-B2 | Captive             | Female | 100              | 57947283   | 11589456600           | SRR7532974       |
| P2-160815-B1 | Captive             | Female | 100              | 70187818   | 14037563600           | SRR7532979       |
| P2-160815-B2 | Captive             | Female | 100              | 104639735  | 20927947000           | SRR7532978       |
| P2-160815-V  | Captive             | Female | 100              | 127407781  | 25481556200           | SRR7532999       |
| P2-160817-B  | Captive             | Female | 100              | 102054005  | 20410801000           | SRR7532941       |
| P2-160914-B1 | Captive             | Female | 100              | 60869073   | 12173814600           | SRR7532886       |
| P2-160914-B2 | Captive             | Female | 100              | 87180222   | 17436044400           | SRR7532887       |
| P2-160914-V  | Captive             | Female | 100              | 129565918  | 25913183600           | SRR7532998       |
| P2-161115-B1 | Captive             | Female | 100              | 95135528   | 19027105600           | SRR7532890       |
| P2-161115-B2 | Captive             | Female | 100              | 77300745   | 15460149000           | SRR7532891       |
| P2-161215-B1 | Captive             | Female | 100              | 93303364   | 18660672800           | SRR7532916       |
| P2-161215-B2 | Captive             | Female | 100              | 89224569   | 17844913800           | SRR7532915       |
| P2-161215-V  | Captive             | Female | 100              | 164913105  | 32982621000           | SRR7533002       |
| P2-170115-B1 | Captive             | Female | 100              | 85444105   | 17088821000           | SRR7532912       |
| P2-170115-B2 | Captive             | Female | 100              | 110133730  | 22026746000           | SRR7532911       |
| P2-170115-V  | Captive             | Female | 100              | 141337316  | 28267463200           | SRR7533006       |
| P2-170215-B1 | Captive             | Female | 100              | 78432723   | 15686544600           | SRR7532918       |
| P2-170215-B2 | Captive             | Female | 100              | 54363481   | 10872696200           | SRR7532917       |
| P2-170215-V  | Captive             | Female | 100              | 89945947   | 17989189400           | SRR7533073       |
| P2-170315-B1 | Captive             | Female | 100              | 76391608   | 15278321600           | SRR7533064       |
| P2-170315-B2 | Captive             | Female | 100              | 57207593   | 11441518600           | SRR7533065       |
| P2-170315-V  | Captive             | Female | 100              | 82159626   | 16431925200           | SRR7533071       |
| P2-170416-B1 | Captive             | Female | 100              | 91589369   | 18317873800           | SRR7533026       |
| P2-170416-B2 | Captive             | Female | 100              | 97879896   | 19575979200           | SRR7533025       |
| P2-170416-V  | Captive             | Female | 100              | 186266002  | 37253200400           | SRR7532966       |
| P2-170515-B1 | Captive             | Female | 100              | 90506647   | 18101329400           | SRR7532934       |
| P2-170515-B2 | Captive             | Female | 100              | 62891403   | 12578280600           | SRR7532935       |
| P2-170515-V  | Captive             | Female | 100              | 84169101   | 16833820200           | SRR7532964       |
| P2-170615-B1 | Captive             | Female | 100              | 53183379   | 10636675800           | SRR7532968       |
| P2-170615-B2 | Captive             | Female | 100              | 58014825   | 11602965000           | SRR7532969       |
| P2-170615-B3 | Captive             | Female | 100              | 65965691   | 13193138200           | SRR7532927       |
| P2-170615-B4 | Captive             | Female | 100              | 55752303   | 11150460600           | SRR7532926       |
| P2-170615-V  | Captive             | Female | 100              | 105326243  | 21065248600           | SRR7532962       |
| P2-170716-B1 | Captive             | Female | 100              | 54496464   | 10899292800           | SRR7532925       |
| P2-170716-B2 | Captive             | Female | 100              | 41268034   | 8253606800            | SRR7532924       |
| P2-170716-B3 | Captive             | Female | 100              | 57463800   | 11492760000           | SRR7532931       |
| P2-170716-B4 | Captive             | Female | 100              | 40256057   | 8051211400            | SRR7532930       |
| P2-170716-V  | Captive             | Female | 100              | 171074233  | 34214846600           | SRR7532960       |

| Sample ID     | Type of giant panda | Sex    | Read length (bp) | # of reads | Sequencing depth (bp) | Accession Number |
|---------------|---------------------|--------|------------------|------------|-----------------------|------------------|
| P3-160627-BV  | Captive             | Female | 100              | 170758698  | 34151739600           | SRR7533077       |
| P3-160704-BV1 | Captive             | Female | 100              | 78522741   | 15704548200           | SRR7533062       |
| P3-160704-BV2 | Captive             | Female | 100              | 48969708   | 9793941600            | SRR7533063       |
| P3-160713-BV  | Captive             | Female | 100              | 169043569  | 33808713800           | SRR7533075       |
| P3-160803-BV  | Captive             | Female | 100              | 141579057  | 28315811400           | SRR7533068       |
| P3-160809-BV  | Captive             | Female | 100              | 161092138  | 32218427600           | SRR7533051       |
| P3-160815-BV1 | Captive             | Female | 100              | 41799448   | 8359889600            | SRR7533087       |
| P3-160815-BV2 | Captive             | Female | 100              | 73146761   | 14629352200           | SRR7533086       |
| P3-160821-BV1 | Captive             | Female | 100              | 129575315  | 25915063000           | SRR7533083       |
| P3-160821-BV2 | Captive             | Female | 100              | 107117742  | 21423548400           | SRR7533082       |
| P3-160827-BV  | Captive             | Female | 100              | 84759195   | 16951839000           | SRR7533050       |
| P3-161011-BV  | Captive             | Female | 100              | 147069904  | 29413980800           | SRR7533055       |
| P3-161213-BV  | Captive             | Female | 100              | 186483193  | 37296638600           | SRR7533054       |
| P3-170118-BV1 | Captive             | Female | 100              | 81044907   | 16208981400           | SRR7533015       |
| P3-170118-BV2 | Captive             | Female | 100              | 52270249   | 10454049800           | SRR7533016       |
| P3-170219-BV1 | Captive             | Female | 100              | 48555820   | 9711164000            | SRR7533013       |
| P3-170219-BV2 | Captive             | Female | 100              | 73332792   | 14666558400           | SRR7533014       |
| P3-170319-BV1 | Captive             | Female | 100              | 54582000   | 10916400000           | SRR7533020       |
| P3-170319-BV2 | Captive             | Female | 100              | 119907782  | 23981556400           | SRR7533021       |
| P4-160626-BV  | Captive             | Female | 100              | 172214184  | 34442836800           | SRR7533076       |
| P4-160627-BV  | Captive             | Female | 100              | 114932138  | 22986427600           | SRR7533074       |
| P4-160704-BV1 | Captive             | Female | 100              | 68874081   | 13774816200           | SRR7533060       |
| P4-160704-BV2 | Captive             | Female | 100              | 67218301   | 13443660200           | SRR7533061       |
| P4-160713-BV1 | Captive             | Female | 100              | 83214584   | 16642916800           | SRR7533058       |
| P4-160713-BV2 | Captive             | Female | 100              | 55913016   | 11182603200           | SRR7533059       |
| P4-160803-BV  | Captive             | Female | 100              | 124085718  | 24817143600           | SRR7533069       |
| P4-160809-BV1 | Captive             | Female | 100              | 70797017   | 14159403400           | SRR7533085       |
| P4-160809-BV2 | Captive             | Female | 100              | 105075468  | 21015093600           | SRR7533084       |
| P4-160815-BV1 | Captive             | Female | 100              | 54263637   | 10852727400           | SRR7533081       |
| P4-160815-BV2 | Captive             | Female | 100              | 37822882   | 7564576400            | SRR7533080       |
| P4-160821-BV1 | Captive             | Female | 100              | 91754495   | 18350899000           | SRR7533079       |
| P4-160821-BV2 | Captive             | Female | 100              | 79331019   | 15866203800           | SRR7533078       |
| P4-160827-BV  | Captive             | Female | 100              | 162810496  | 32562099200           | SRR7533053       |
| P4-160828-BV  | Captive             | Female | 100              | 147472278  | 29494455600           | SRR7532940       |
| P4-160915-BV  | Captive             | Female | 100              | 144576624  | 28915324800           | SRR7533052       |
| P4-161214-BV  | Captive             | Female | 100              | 172880031  | 34576006200           | SRR7533057       |
| P4-170118-BV1 | Captive             | Female | 100              | 80638856   | 16127771200           | SRR7533017       |
| P4-170118-BV2 | Captive             | Female | 100              | 76867448   | 15373489600           | SRR7533018       |
| P4-170214-BV1 | Captive             | Female | 100              | 81894833   | 16378966600           | SRR7533011       |
| P4-170214-BV2 | Captive             | Female | 100              | 73890119   | 14778023800           | SRR7533012       |
| P4-170319-BV1 | Captive             | Female | 100              | 106180311  | 21236062200           | SRR7533038       |

| Sample ID     | Type of giant panda | Sex    | Read length (bp) | # of reads | Sequencing depth (bp) | Accession Number |
|---------------|---------------------|--------|------------------|------------|-----------------------|------------------|
| P4-170319-BV2 | Captive             | Female | 100              | 72950711   | 14590142200           | SRR7533037       |
| R1-161113-B1  | Captive             | Miss   | 100              | 61285855   | 12257171000           | SRR7533036       |
| R1-161113-B2  | Captive             | Miss   | 100              | 46899218   | 9379843600            | SRR7533035       |
| R1-161113-V   | Captive             | Miss   | 100              | 171077905  | 34215581000           | SRR7533056       |
| R1-161120-B1  | Captive             | Miss   | 100              | 51223262   | 10244652400           | SRR7532905       |
| R1-161120-B2  | Captive             | Miss   | 100              | 81292305   | 16258461000           | SRR7532895       |
| R1-161120-V   | Captive             | Miss   | 100              | 134001607  | 26800321400           | SRR7532945       |
| R1-161129-B1  | Captive             | Miss   | 100              | 76633575   | 15326715000           | SRR7533040       |
| R1-161129-B2  | Captive             | Miss   | 100              | 52404765   | 10480953000           | SRR7533039       |
| R1-161129-V   | Captive             | Miss   | 100              | 90855453   | 18171090600           | SRR7533047       |
| R1-161208-B1  | Captive             | Miss   | 100              | 50156323   | 10031264600           | SRR7532952       |
| R1-161208-B2  | Captive             | Miss   | 100              | 56486883   | 11297376600           | SRR7532953       |
| R1-161208-V   | Captive             | Miss   | 100              | 161633748  | 32326749600           | SRR7532902       |
| R1-161215-B1  | Captive             | Miss   | 100              | 60592277   | 12118455400           | SRR7532950       |
| R1-161215-B2  | Captive             | Miss   | 100              | 92040376   | 18408075200           | SRR7532951       |
| R1-161215-V   | Captive             | Miss   | 100              | 162603362  | 32520672400           | SRR7533090       |
| R1-170115-B1  | Captive             | Miss   | 100              | 88879579   | 17775915800           | SRR7532954       |
| R1-170115-B2  | Captive             | Miss   | 100              | 62820500   | 12564100000           | SRR7532955       |
| R1-170115-V   | Captive             | Miss   | 100              | 154110390  | 30822078000           | SRR7532907       |
| R1-170215-B1  | Captive             | Miss   | 100              | 70833306   | 14166661200           | SRR7532991       |
| R1-170215-B2  | Captive             | Miss   | 100              | 51129179   | 10225835800           | SRR7532990       |
| R1-170315-B1  | Captive             | Miss   | 100              | 61364355   | 12272871000           | SRR7532997       |
| R1-170315-B2  | Captive             | Miss   | 100              | 49960236   | 9992047200            | SRR7532996       |
| R1-170315-B3  | Captive             | Miss   | 100              | 61685287   | 12337057400           | SRR7532987       |
| R1-170315-B4  | Captive             | Miss   | 100              | 48490638   | 9698127600            | SRR7532986       |
| R1-170315-V   | Captive             | Miss   | 100              | 169400469  | 33880093800           | SRR7532899       |
| R1-170416-B1  | Captive             | Miss   | 100              | 87036752   | 17407350400           | SRR7532894       |
| R1-170416-B2  | Captive             | Miss   | 100              | 94485362   | 18897072400           | SRR7532900       |
| R1-170416-V   | Captive             | Miss   | 100              | 219756148  | 43951229600           | SRR7533099       |
| R1-170516-B1  | Captive             | Miss   | 100              | 94639518   | 18927903600           | SRR7532919       |
| R1-170516-B2  | Captive             | Miss   | 100              | 85212171   | 17042434200           | SRR7533049       |
| R1-170516-V   | Captive             | Miss   | 100              | 159337447  | 31867489400           | SRR7533096       |
| R1-170615-B1  | Captive             | Miss   | 100              | 81487667   | 16297533400           | SRR7533089       |
| R1-170615-B2  | Captive             | Miss   | 100              | 101634539  | 20326907800           | SRR7533023       |
| R1-170615-V   | Captive             | Miss   | 100              | 159006642  | 31801328400           | SRR7533094       |
| R1-170716-B1  | Captive             | Miss   | 100              | 79193298   | 15838659600           | SRR7533033       |
| R1-170716-B2  | Captive             | Miss   | 100              | 60225836   | 12045167200           | SRR7533022       |
| R1-170716-V   | Captive             | Miss   | 100              | 124610693  | 24922138600           | SRR7533092       |
| R2-161113-B1  | Captive             | Miss   | 100              | 58053171   | 11610634200           | SRR7533042       |
| R2-161113-B2  | Captive             | Miss   | 100              | 28170400   | 5634080000            | SRR7533041       |
| R2-161113-V   | Captive             | Miss   | 100              | 182569131  | 36513826200           | SRR7533048       |

| Sample ID    | Type of giant panda | Sex  | Read length (bp) | # of reads | Sequencing depth (bp) | Accession Number |
|--------------|---------------------|------|------------------|------------|-----------------------|------------------|
| R2-161120-B1 | Captive             | Miss | 100              | 52014768   | 10402953600           | SRR7533031       |
| R2-161120-B2 | Captive             | Miss | 100              | 63799469   | 12759893800           | SRR7533088       |
| R2-161120-V  | Captive             | Miss | 100              | 110561057  | 22112211400           | SRR7533034       |
| R2-161129-B1 | Captive             | Miss | 100              | 63790057   | 12758011400           | SRR7533045       |
| R2-161129-B2 | Captive             | Miss | 100              | 50182109   | 10036421800           | SRR7533044       |
| R2-161129-V  | Captive             | Miss | 100              | 195373959  | 39074791800           | SRR7532901       |
| R2-161208-B  | Captive             | Miss | 100              | 84491604   | 16898320800           | SRR7532903       |
| R2-161208-V  | Captive             | Miss | 100              | 234061574  | 46812314800           | SRR7532904       |
| R2-161215-B1 | Captive             | Miss | 100              | 54211293   | 10842258600           | SRR7532956       |
| R2-161215-B2 | Captive             | Miss | 100              | 120668043  | 24133608600           | SRR7532957       |
| R2-161215-V  | Captive             | Miss | 100              | 147542421  | 29508484200           | SRR7532906       |
| R2-170115-B1 | Captive             | Miss | 100              | 80342280   | 16068456000           | SRR7532948       |
| R2-170115-B2 | Captive             | Miss | 100              | 67885860   | 13577172000           | SRR7532949       |
| R2-170115-V  | Captive             | Miss | 100              | 73628934   | 14725786800           | SRR7532908       |
| R2-170215-B1 | Captive             | Miss | 100              | 2.27E+07   | 4542309200            | SRR7532993       |
| R2-170215-B2 | Captive             | Miss | 100              | 44681373   | 8936274600            | SRR7532992       |
| R2-170215-B3 | Captive             | Miss | 100              | 42056956   | 8411391200            | SRR7532995       |
| R2-170215-B4 | Captive             | Miss | 100              | 28782185   | 5756437000            | SRR7532994       |
| R2-170215-V  | Captive             | Miss | 100              | 179611454  | 35922290800           | SRR7532898       |
| R2-170315-B1 | Captive             | Miss | 100              | 35691149   | 7138229800            | SRR7532967       |
| R2-170315-B2 | Captive             | Miss | 100              | 23101180   | 4620236000            | SRR7532963       |
| R2-170315-B3 | Captive             | Miss | 100              | 66462651   | 13292530200           | SRR7532981       |
| R2-170315-B4 | Captive             | Miss | 100              | 66819956   | 13363991200           | SRR7532980       |
| R2-170315-V  | Captive             | Miss | 100              | 109457139  | 21891427800           | SRR7533100       |
| R2-170416-B  | Captive             | Miss | 100              | 164965175  | 32993035000           | SRR7533098       |
| R2-170416-V  | Captive             | Miss | 100              | 120833125  | 24166625000           | SRR7533097       |
| R2-170516-B1 | Captive             | Miss | 100              | 78052536   | 15610507200           | SRR7532920       |
| R2-170516-B2 | Captive             | Miss | 100              | 57539887   | 11507977400           | SRR7532921       |
| R2-170516-V  | Captive             | Miss | 100              | 88487376   | 17697475200           | SRR7533095       |
| R2-170615-B1 | Captive             | Miss | 100              | 69508393   | 13901678600           | SRR7532958       |
| R2-170615-B2 | Captive             | Miss | 100              | 53773894   | 10754778800           | SRR7533024       |
| R2-170615-V  | Captive             | Miss | 100              | 147730607  | 29546121400           | SRR7533093       |
| R2-170716-B1 | Captive             | Miss | 100              | 134426928  | 26885385600           | SRR7533019       |
| R2-170716-B2 | Captive             | Miss | 100              | 107992844  | 21598568800           | SRR7533008       |
| R2-170716-V  | Captive             | Miss | 100              | 191385929  | 38277185800           | SRR7533091       |
| CC1301       | Wild                | Male | 101              | 25451795   | 5141262590            | CRR055205        |
| CY1204       | Wild                | Male | 101              | 34701556   | 7009714312            | CRR055206        |
| CY1205       | Wild                | Male | 101              | 42370946   | 8558931092            | CRR055207        |
| CY1305       | Wild                | Male | 101              | 32371116   | 6538965432            | CRR055208        |
| CY1307       | Wild                | Male | 101              | 36719938   | 7417427476            | CRR055209        |
| CY1208       | Wild                | Male | 101              | 44348437   | 8958384274            | CRR055210        |



| Sample ID | Type of giant panda | Sex    | Read length (bp) | # of reads | Sequencing depth (bp) | Accession Number |
|-----------|---------------------|--------|------------------|------------|-----------------------|------------------|
| CY1308    | Wild                | Male   | 101              | 42079035   | 8499965070            | CRR055211        |
| NN1201    | Wild                | Female | 101              | 28795050   | 5816600100            | CRR055212        |
| NN1204    | Wild                | Female | 101              | 32345938   | 6533879476            | CRR055213        |
| NN1301    | Wild                | Female | 101              | 37471094   | 7569160988            | CRR055214        |
| NN1303    | Wild                | Female | 101              | 18032938   | 3642653476            | CRR055215        |
| NN1305    | Wild                | Female | 101              | 30783431   | 6218253062            | CRR055216        |
| WW1208    | Wild                | Male   | 101              | 40250417   | 8130584234            | CRR055217        |
| WW1307    | Wild                | Male   | 101              | 32889255   | 6643629510            | CRR055218        |
| WW1308    | Wild                | Male   | 101              | 36147084   | 7301710968            | CRR055219        |
| XM1303    | Wild                | Female | 101              | 23602751   | 4767755702            | CRR055220        |
| XM1305    | Wild                | Female | 101              | 41872462   | 8458237324            | CRR055221        |
| XM1307    | Wild                | Female | 101              | 35038011   | 7077678222            | CRR055222        |
| XM1308    | Wild                | Female | 101              | 37709153   | 7617248906            | CRR055223        |
| XY1201    | Wild                | Male   | 101              | 28336528   | 5723978656            | CRR055224        |
| XY1204    | Wild                | Male   | 101              | 27142142   | 5482712684            | CRR055225        |
| XY1207    | Wild                | Male   | 101              | 36158757   | 7304068914            | CRR055226        |
| XY1301    | Wild                | Male   | 101              | 17356961   | 3506106122            | CRR055227        |
| XY1303    | Wild                | Male   | 101              | 34051351   | 6878372902            | CRR055228        |
| XY1305    | Wild                | Male   | 101              | 33129779   | 6692215358            | CRR055229        |
| XY1307    | Wild                | Male   | 101              | 28503099   | 5757625998            | CRR055230        |
| XY1308    | Wild                | Male   | 101              | 34560390   | 6981198780            | CRR055231        |
| H-10      | Captive             | Female | 150              | 70487899   | 21146369700           | NA               |
| H-1       | Captive             | Female | 150              | 75597013   | 22679103900           | NA               |
| H-2       | Captive             | Male   | 150              | 68604229   | 20581268700           | NA               |
| H-3       | Captive             | Female | 150              | 71028905   | 21308671500           | NA               |
| H-4       | Captive             | Female | 150              | 68610058   | 20583017400           | NA               |
| H-5       | Captive             | Miss   | 150              | 80825469   | 24247640700           | NA               |
| H-6       | Captive             | Female | 150              | 75167493   | 22550247900           | NA               |
| H-7       | Captive             | Female | 150              | 68316383   | 20494914900           | NA               |
| H-8       | Captive             | Female | 150              | 70055366   | 21016609800           | NA               |
| H-9       | Captive             | Female | 150              | 68614227   | 20584268100           | NA               |
| SF-10     | Captive             | Female | 150              | 68714678   | 20614403400           | NA               |
| SF-11     | Captive             | Female | 150              | 101920153  | 30576045900           | NA               |
| SF-12     | Captive             | Male   | 150              | 71171705   | 21351511500           | NA               |
| SF-13     | Captive             | Female | 150              | 66924514   | 20077354200           | NA               |
| SF-14     | Captive             | Female | 150              | 67827031   | 20348109300           | NA               |
| SF-15     | Captive             | Female | 150              | 72873789   | 21862136700           | NA               |
| SF-16     | Captive             | Female | 150              | 70081251   | 21024375300           | NA               |
| SF-17     | Captive             | Female | 150              | 79967451   | 23990235300           | NA               |
| SF-18     | Captive             | Female | 150              | 72285143   | 21685542900           | NA               |
| SF-1      | Captive             | Male   | 150              | 68985546   | 20695663800           | NA               |

| Sample ID | Type of giant panda | Sex    | Read length (bp) | # of reads | Sequencing depth (bp) | Accession Number |
|-----------|---------------------|--------|------------------|------------|-----------------------|------------------|
| SF-2      | Captive             | Male   | 150              | 67179351   | 20153805300           | NA               |
| SF-3      | Captive             | Female | 150              | 69781744   | 20934523200           | NA               |
| SF-4      | Captive             | Male   | 150              | 69447080   | 20834124000           | NA               |
| SF-5      | Captive             | Female | 150              | 71895981   | 21568794300           | NA               |
| SF-6      | Captive             | Female | 150              | 69228030   | 20768409000           | NA               |
| SF-7      | Captive             | Male   | 150              | 73679463   | 22103838900           | NA               |
| SF-8      | Captive             | Female | 150              | 69228030   | 20768409000           | NA               |
| SN-10     | Captive             | Male   | 150              | 70179831   | 21053949300           | NA               |
| SN-11     | Captive             | Female | 150              | 71294604   | 21388381200           | NA               |
| SN-13     | Captive             | Female | 150              | 69510693   | 20853207900           | NA               |
| SN-14     | Captive             | Male   | 150              | 78948301   | 23684490300           | NA               |
| SN-15     | Captive             | Female | 150              | 77087144   | 23126143200           | NA               |
| SN-16     | Captive             | Female | 150              | 73007449   | 21902234700           | NA               |
| SN-1      | Captive             | Male   | 150              | 67487682   | 20246304600           | NA               |
| SN-2      | Captive             | Male   | 150              | 69920027   | 20976008100           | NA               |
| SN-3      | Captive             | Female | 150              | 68362998   | 20508899400           | NA               |
| SN-4      | Captive             | Male   | 150              | 69801448   | 20940434400           | NA               |
| SN-5      | Captive             | Female | 150              | 73545105   | 22063531500           | NA               |
| SN-6      | Captive             | Female | 150              | 75647340   | 22694202000           | NA               |
| SN-8      | Captive             | Female | 150              | 82136168   | 24640850400           | NA               |
| SN-9      | Captive             | Female | 150              | 68813373   | 20644011900           | NA               |
| SW-10     | Captive             | Male   | 150              | 71868283   | 21560484900           | NA               |
| SW-11     | Captive             | Female | 150              | 68954630   | 20686389000           | NA               |
| SW-12     | Captive             | Female | 150              | 69543896   | 20863168800           | NA               |
| SW-14     | Captive             | Male   | 150              | 67043365   | 20113009500           | NA               |
| SW-15     | Captive             | Male   | 150              | 84590857   | 25377257100           | NA               |
| SW-1      | Captive             | Male   | 150              | 71265889   | 21379766700           | NA               |
| SW-2      | Captive             | Female | 150              | 67740117   | 20322035100           | NA               |
| SW-3      | Captive             | Male   | 150              | 71679475   | 21503842500           | NA               |
| SW-5      | Captive             | Male   | 150              | 67496251   | 20248875300           | NA               |
| SW-6      | Captive             | Male   | 150              | 72672607   | 21801782100           | NA               |
| SW-7      | Captive             | Male   | 150              | 71385916   | 21415774800           | NA               |
| SW-8      | Captive             | Female | 150              | 75203768   | 22561130400           | NA               |
| SW-9      | Captive             | Male   | 150              | 71770235   | 21531070500           | NA               |
| DD-1      | Captive             | Male   | 150              | 104801132  | 31440339600           | NA               |
| DD-10     | Captive             | Female | 150              | 102144147  | 30643244100           | NA               |
| DD-11     | Captive             | Male   | 150              | 73596570   | 22078971000           | NA               |
| DD-2      | Captive             | Male   | 150              | 103392856  | 31017856800           | NA               |
| DD-3      | Captive             | Female | 150              | 70253859   | 21076157700           | NA               |
| DD-4      | Captive             | Male   | 150              | 109349000  | 32804700000           | NA               |
| DD-5      | Captive             | Male   | 150              | 75712426   | 22713727800           | NA               |

| Sample ID | Type of giant panda | Sex    | Read length (bp) | # of reads | Sequencing depth (bp) | Accession Number |
|-----------|---------------------|--------|------------------|------------|-----------------------|------------------|
| DD-6      | Captive             | Female | 150              | 69664963   | 20899488900           | NA               |
| DD-7      | Captive             | Female | 150              | 85800657   | 25740197100           | NA               |
| DD-8      | Captive             | Female | 150              | 107680392  | 32304117600           | NA               |
| DD-9      | Captive             | Male   | 150              | 80010565   | 24003169500           | NA               |
| DG-1      | Captive             | Female | 150              | 106645933  | 31993779900           | NA               |
| DG-2      | Captive             | Male   | 150              | 69946604   | 20983981200           | NA               |
| DG-3      | Captive             | Male   | 150              | 103764943  | 31129482900           | NA               |
| DG-4      | Captive             | Male   | 150              | 102376492  | 30712947600           | NA               |
| DG-5      | Captive             | Female | 150              | 110134695  | 33040408500           | NA               |
| DG-6      | Captive             | Male   | 150              | 67125806   | 20137741800           | NA               |
| DJ-1      | Captive             | Female | 150              | 103092166  | 30927649800           | NA               |
| DJ-2      | Captive             | Male   | 150              | 111271028  | 33381308400           | NA               |
| DJ-3      | Captive             | Female | 150              | 85829533   | 25748859900           | NA               |
| DJ-4      | Captive             | Male   | 150              | 100374185  | 30112255500           | NA               |
| DJ-5      | Captive             | Male   | 150              | 111527041  | 33458112300           | NA               |
| DJ-6      | Captive             | Female | 150              | 103514515  | 31054354500           | NA               |
| DJ-7      | Captive             | Male   | 150              | 109228707  | 32768612100           | NA               |
| DP-1      | Captive             | Female | 150              | 75444206   | 22633261800           | NA               |
| DP-2      | Captive             | Female | 150              | 73876642   | 22162992600           | NA               |
| DP-3      | Captive             | Female | 150              | 77093327   | 23127998100           | NA               |
| DP-4      | Captive             | Female | 150              | 72973326   | 21891997800           | NA               |
| DP-5      | Captive             | Male   | 150              | 75102820   | 22530846000           | NA               |
| DS-1      | Captive             | Male   | 150              | 66945332   | 20083599600           | NA               |
| DS-2      | Captive             | Male   | 150              | 70067707   | 21020312100           | NA               |
| DS-3      | Captive             | Female | 150              | 70442364   | 21132709200           | NA               |
| DS-4      | Captive             | Female | 150              | 78492172   | 23547651600           | NA               |
| DS-5      | Captive             | Female | 150              | 68907097   | 20672129100           | NA               |
| DS-6      | Captive             | Female | 150              | 71326858   | 21398057400           | NA               |
| DS-7      | Captive             | Female | 150              | 69151454   | 20745436200           | NA               |
| WY112     | Wild                | Miss   | 150              | 102395287  | 30718586100           | NA               |
| WY113     | Wild                | Miss   | 150              | 96649301   | 28994790300           | NA               |
| WY115     | Wild                | Miss   | 150              | 103728975  | 31118692500           | NA               |
| WY116     | Wild                | Miss   | 150              | 102394790  | 30718437000           | NA               |
| WY118     | Wild                | Miss   | 150              | 104707959  | 31412387700           | NA               |
| WY120     | Wild                | Miss   | 150              | 118740778  | 35622233400           | NA               |
| WY135     | Wild                | Miss   | 150              | 96558799   | 28967639700           | NA               |
| WY137     | Wild                | Miss   | 150              | 101824240  | 30547272000           | NA               |

**Table S2. Details of assembled medium- and high- quality MAGs**

| MAGs ID | genus               | species                      | Completeness (%) | Contamination (%) | Num. of scaffolds | N50 of scaffolds (bp) | Num. of 16S rRNA | Num. of 5S rRNA | Num. of 23S rRNA | Num. of rRNA | Genes for Hemi/Cellulose |
|---------|---------------------|------------------------------|------------------|-------------------|-------------------|-----------------------|------------------|-----------------|------------------|--------------|--------------------------|
| MAG001  | g_Acinetobacter     | s_Acinetobacter nosocomialis | 100.00           | 1.94              | 1                 | 3995565               | 3                | 3               | 3                | 9            | 0                        |
| MAG002  | g_Basfia_A          | s_MAG002                     | 100.00           | 1.13              | 12                | 274234                | 0                | 0               | 0                | 0            | 0                        |
| MAG003  | g_Brevundimonas     | s_MAG003                     | 100.00           | 0.65              | 19                | 460440                | 0                | 1               | 1                | 0            | 2                        |
| MAG004  | g_Lactococcus       | s_Lactococcus lactis_E       | 100.00           | 0.57              | 9                 | 514361                | 0                | 1               | 0                | 0            | 1                        |
| MAG005  | g_MAG005            | s_MAG005                     | 100.00           | 0.54              | 24                | 240186                | 0                | 0               | 0                | 0            | 0                        |
| MAG006  | g_Bifidobacterium   | s_Bifidobacterium breve      | 100.00           | 0.00              | 6                 | 538961                | 0                | 0               | 0                | 0            | 1                        |
| MAG007  | g_Terrisporobacter  | s_Terrisporobacter mayombe   | 100.00           | 0.00              | 98                | 39038                 | 0                | 3               | 0                | 2            | 1                        |
| MAG008  | g_Basfia_A          | s_MAG008                     | 99.96            | 0.56              | 18                | 292715                | 0                | 1               | 0                | 0            | 0                        |
| MAG009  | g_Polynucleobacter  | s_MAG009                     | 99.87            | 0.31              | 5                 | 515287                | 0                | 1               | 0                | 0            | 0                        |
| MAG010  | g_Veillonella       | s_Veillonella sp900757715    | 99.85            | 0.00              | 27                | 110087                | 0                | 2               | 0                | 1            | 0                        |
| MAG011  | g_Erysipelothrix    | s_MAG011                     | 99.76            | 0.00              | 86                | 46805                 | 0                | 0               | 0                | 1            | 0                        |
| MAG012  | g_Streptococcus     | s_MAG012                     | 99.64            | 1.03              | 27                | 163239                | 0                | 0               | 0                | 1            | 0                        |
| MAG013  | g_Enterococcus_B    | s_Enterococcus_B hirae       | 99.63            | 0.12              | 1                 | 2705424               | 4                | 4               | 4                | 3            | 0                        |
| MAG014  | g_Enterococcus      | s_Enterococcus faecalis      | 99.63            | 0.00              | 7                 | 386622                | 0                | 0               | 0                | 0            | 1                        |
| MAG015  | g_Brumimicrobium    | s_MAG015                     | 99.46            | 2.70              | 89                | 70885                 | 0                | 0               | 0                | 0            | 0                        |
| MAG016  | g_Providencia       | s_Providencia alcalifaciens  | 99.46            | 0.54              | 1                 | 3782785               | 5                | 5               | 4                | 6            | 0                        |
| MAG017  | g_Kocuria           | s_MAG017                     | 99.34            | 1.32              | 89                | 63030                 | 0                | 0               | 0                | 0            | 0                        |
| MAG018  | g_Enterococcus_J    | s_MAG018                     | 99.34            | 0.33              | 6                 | 597069                | 0                | 0               | 0                | 0            | 0                        |
| MAG019  | g_Enterococcus_G    | s_Enterococcus_G sulfureus   | 99.34            | 0.00              | 1                 | 2278706               | 3                | 3               | 3                | 19           | 1                        |
| MAG020  | g_Ligilactobacillus | s_Ligilactobacillus animalis | 99.30            | 0.00              | 6                 | 373240                | 1                | 1               | 0                | 0            | 0                        |
| MAG021  | g_Myroides          | s_MAG021                     | 99.26            | 9.70              | 94                | 69568                 | 0                | 0               | 0                | 0            | 0                        |
| MAG022  | g_Mycetocola        | s_MAG022                     | 99.24            | 0.34              | 1                 | 3087133               | 5                | 6               | 5                | 0            | 1                        |
| MAG023  | g_Wohlfahrtiimonas  | s_MAG023                     | 99.22            | 0.15              | 51                | 72325                 | 0                | 0               | 0                | 0            | 0                        |
| MAG024  | g_Enterococcus_D    | s_Enterococcus_D sp002850    | 99.12            | 0.38              | 1                 | 3722498               | 4                | 4               | 4                | 3            | 4                        |
| MAG025  | g_Lactobacillus     | s_Lactobacillus johnsonii    | 99.03            | 0.00              | 7                 | 342092                | 0                | 0               | 0                | 0            | 0                        |
| MAG026  | g_Acinetobacter     | s_Acinetobacter soli         | 99.00            | 2.52              | 11                | 708335                | 7                | 6               | 7                | 0            | 0                        |
| MAG027  | g_Lactobacillus     | s_Lactobacillus acidophilus  | 98.94            | 0.32              | 9                 | 368600                | 0                | 0               | 0                | 0            | 0                        |
| MAG028  | g_UBA3376           | s_MAG028                     | 98.92            | 2.21              | 156               | 22742                 | 0                | 1               | 0                | 0            | 3                        |
| MAG029  | g_Oceanisphaera     | s_MAG029                     | 98.89            | 0.00              | 54                | 81369                 | 0                | 0               | 0                | 0            | 0                        |
| MAG030  | g_Sphingobacterium  | s_MAG030                     | 98.89            | 0.79              | 37                | 119594                | 0                | 1               | 0                | 2            | 0                        |
| MAG031  | g_Leuconostoc       | s_Leuconostoc lactis_A       | 98.88            | 0.00              | 5                 | 553628                | 0                | 0               | 0                | 0            | 0                        |

| MAGs ID | genus                 | species                         | Completeness (%) | Contamination (%) | Num. of scaffolds | N50 of scaffolds (bp) | Num. of 16S rRNA | Num. of 5S rRNA | Num. of 23S rRNA | Num. of rRNA | Genes for Hemi/Cellulose |
|---------|-----------------------|---------------------------------|------------------|-------------------|-------------------|-----------------------|------------------|-----------------|------------------|--------------|--------------------------|
| MAG032  | g_Lactococcus         | s_Lactococcus garvieae          | 98.83            | 0.84              | 1                 | 2163881               | 0                | 1               | 0                | 14           | 0                        |
| MAG033  | g_Ligilactobacillus   | s_MAG033                        | 98.69            | 0.00              | 11                | 289587                | 0                | 1               | 0                | 0            | 0                        |
| MAG034  | g_Anaerosporebacter   | s_MAG034                        | 98.66            | 3.80              | 171               | 38345                 | 0                | 0               | 0                | 0            | 6                        |
| MAG035  | g_Limosilactobacillus | s_Limosilactobacillus mucosae   | 98.64            | 0.00              | 1                 | 2138120               | 2                | 2               | 2                | 18           | 0                        |
| MAG036  | g_Enterococcus_C      | s_Enterococcus_C saigonensis    | 98.60            | 1.11              | 105               | 45208                 | 0                | 0               | 0                | 4            | 1                        |
| MAG037  | g_Staphylococcus      | s_MAG037                        | 98.55            | 8.78              | 107               | 39215                 | 0                | 1               | 0                | 1            | 3                        |
| MAG038  | g_Frederiksenia       | s_MAG038                        | 98.52            | 2.91              | 79                | 97509                 | 0                | 0               | 0                | 2            | 1                        |
| MAG039  | g_Enterococcus_I      | s_Enterococcus_I alcedinis      | 98.51            | 0.00              | 8                 | 657615                | 0                | 0               | 0                | 0            | 0                        |
| MAG040  | g_Sphingobacterium    | s_Sphingobacterium kitahirose   | 98.46            | 1.61              | 103               | 113592                | 0                | 0               | 0                | 1            | 3                        |
| MAG041  | g_Clostridium_P       | s_Clostridium_P ventriculi      | 98.39            | 0.48              | 27                | 154413                | 0                | 1               | 0                | 2            | 0                        |
| MAG042  | g_Providencia         | s_Providencia alcalifaciens     | 98.37            | 0.00              | 14                | 573209                | 0                | 0               | 0                | 0            | 0                        |
| MAG043  | g_Carnobacterium      | s_Carnobacterium maltaroma      | 98.36            | 5.66              | 139               | 44518                 | 0                | 0               | 0                | 2            | 1                        |
| MAG044  | g_Lactococcus         | s_Lactococcus lactis_E          | 98.33            | 2.26              | 3                 | 1444583               | 2                | 3               | 2                | 12           | 1                        |
| MAG045  | g_Ligilactobacillus   | s_Ligilactobacillus salivarius  | 98.32            | 1.57              | 1                 | 1609992               | 2                | 3               | 2                | 12           | 0                        |
| MAG046  | g_Leucobacter         | s_MAG046                        | 98.25            | 0.58              | 41                | 120633                | 0                | 0               | 0                | 0            | 1                        |
| MAG047  | g_Streptococcus       | s_MAG047                        | 98.20            | 0.00              | 13                | 222664                | 0                | 0               | 0                | 0            | 0                        |
| MAG048  | g_Limosilactobacillus | s_Limosilactobacillus vaginalis | 98.19            | 0.54              | 42                | 64055                 | 0                | 1               | 0                | 2            | 0                        |
| MAG049  | g_Lactococcus         | s_Lactococcus lactis            | 98.11            | 0.38              | 1                 | 2133408               | 5                | 5               | 5                | 4            | 0                        |
| MAG050  | g_Streptococcus       | s_Streptococcus orisratti       | 98.08            | 1.16              | 1                 | 2600539               | 6                | 6               | 7                | 0            | 1                        |
| MAG051  | g_Pantoea             | s_Pantoea brenneri              | 98.06            | 1.29              | 91                | 76461                 | 0                | 0               | 0                | 0            | 2                        |
| MAG052  | g_Paenibacillus       | s_MAG052                        | 98.04            | 1.29              | 30                | 433594                | 8                | 8               | 8                | 3            | 12                       |
| MAG053  | g_UBA2632             | s_MAG053                        | 97.97            | 0.82              | 161               | 41804                 | 0                | 0               | 0                | 0            | 2                        |
| MAG054  | g_Hafnia              | s_Hafnia alvei                  | 97.90            | 0.88              | 47                | 182233                | 0                | 0               | 0                | 0            | 2                        |
| MAG055  | g_Enterococcus        | s_Enterococcus faecalis         | 97.88            | 0.37              | 1                 | 2694999               | 2                | 2               | 2                | 6            | 1                        |
| MAG056  | g_Brochothrix         | s_Brochothrix thermosphacta     | 97.79            | 1.43              | 162               | 31719                 | 0                | 0               | 0                | 2            | 2                        |
| MAG057  | g>Weissella           | s>Weissella confusa             | 97.78            | 2.91              | 1                 | 2174119               | 6                | 7               | 6                | 9            | 0                        |
| MAG058  | g_Flavobacterium      | s_MAG058                        | 97.76            | 4.35              | 200               | 35325                 | 0                | 0               | 0                | 0            | 0                        |
| MAG059  | g_Bifidobacterium     | s_Bifidobacterium animalis      | 97.62            | 0.00              | 1                 | 2239137               | 2                | 2               | 2                | 0            | 3                        |
| MAG060  | g_Helicobacter_A      | s_MAG060                        | 97.51            | 0.82              | 30                | 100005                | 0                | 0               | 0                | 0            | 0                        |
| MAG061  | g_Lactococcus         | s_Lactococcus garvieae          | 97.39            | 1.15              | 93                | 32235                 | 0                | 1               | 0                | 3            | 0                        |
| MAG062  | g_Bacteroides         | s_MAG062                        | 97.37            | 0.64              | 92                | 47403                 | 0                | 0               | 0                | 0            | 3                        |
| MAG063  | g_Streptococcus       | s_Streptococcus ferus           | 97.35            | 0.75              | 3                 | 1147145               | 4                | 4               | 4                | 3            | 0                        |
| MAG064  | g_Lactococcus         | s_Lactococcus garvieae          | 97.33            | 2.91              | 1                 | 2014915               | 5                | 5               | 5                | 1            | 0                        |

| MAGs ID | genus               | species                        | Completeness (%) | Contamination (%) | Num. of scaffolds | N50 of scaffolds (bp) | Num. of 16S rRNA | Num. of 5S rRNA | Num. of 23S rRNA | Num. of rRNA | Genes for Hemi/Cellulose |
|---------|---------------------|--------------------------------|------------------|-------------------|-------------------|-----------------------|------------------|-----------------|------------------|--------------|--------------------------|
| MAG065  | g_Sphingobacterium  | s_MAG065                       | 97.33            | 3.81              | 101               | 79592                 | 0                | 0               | 0                | 1            | 3                        |
| MAG066  | g_Plesiomonas       | s_Plesiomonas shigelloides     | 97.31            | 0.54              | 18                | 331152                | 0                | 0               | 0                | 0            | 1                        |
| MAG067  | g_Klebsiella        | s_Klebsiella quasipneumonia    | 97.29            | 5.76              | 20                | 546819                | 0                | 0               | 0                | 0            | 2                        |
| MAG068  | g_Algoriella        | s_Algoriella xinjiangensis     | 97.25            | 0.00              | 36                | 156837                | 0                | 0               | 0                | 0            | 3                        |
| MAG069  | g_Lactococcus_A     | s_Lactococcus_A laudensis      | 97.16            | 2.33              | 6                 | 675684                | 1                | 1               | 1                | 3            | 0                        |
| MAG070  | g_Streptococcus     | s_Streptococcus pluranimaliu   | 97.09            | 0.37              | 19                | 158045                | 0                | 0               | 0                | 0            | 0                        |
| MAG071  | g_Sphingobacterium  | s_MAG071                       | 97.00            | 0.16              | 61                | 109127                | 0                | 0               | 0                | 0            | 2                        |
| MAG072  | g_Pseudomonas_D     | s_MAG072                       | 96.98            | 1.32              | 54                | 120304                | 0                | 0               | 0                | 0            | 0                        |
| MAG073  | g_Soonwooa          | s_MAG073                       | 96.94            | 0.49              | 188               | 26177                 | 0                | 0               | 0                | 0            | 2                        |
| MAG074  | g_Streptococcus     | s_Streptococcus mutans         | 96.88            | 0.87              | 45                | 62771                 | 0                | 0               | 0                | 1            | 0                        |
| MAG075  | g_Rodentibacter     | s_Rodentibacter ratti          | 96.88            | 0.64              | 86                | 39416                 | 0                | 0               | 0                | 1            | 0                        |
| MAG076  | g_Bergeyella_A      | s_MAG076                       | 96.77            | 1.61              | 119               | 20437                 | 0                | 0               | 0                | 2            | 0                        |
| MAG077  | g_Clostridium       | s_MAG077                       | 96.77            | 0.81              | 101               | 39495                 | 0                | 0               | 0                | 0            | 0                        |
| MAG078  | g_Enterococcus_D    | s_Enterococcus_D gallinarum    | 96.68            | 0.38              | 94                | 61244                 | 0                | 0               | 0                | 2            | 1                        |
| MAG079  | g_Clostridium_P     | s_Clostridium_P massiliamaz    | 96.64            | 3.06              | 68                | 98950                 | 0                | 2               | 0                | 1            | 0                        |
| MAG080  | g_Providencia       | s_Providencia alcalifaciens    | 96.63            | 3.80              | 64                | 177474                | 0                | 2               | 0                | 1            | 0                        |
| MAG081  | g_Helicobacter_C    | s_MAG081                       | 96.60            | 1.71              | 107               | 31960                 | 0                | 0               | 0                | 0            | 0                        |
| MAG082  | g_Paenibacillus     | s_MAG082                       | 96.57            | 1.16              | 241               | 32514                 | 0                | 1               | 0                | 0            | 5                        |
| MAG083  | g_Pseudomonas_D     | s_MAG083                       | 96.56            | 0.60              | 56                | 86712                 | 0                | 1               | 0                | 1            | 0                        |
| MAG084  | g_Lactococcus       | s_Lactococcus lactis           | 96.26            | 2.18              | 1                 | 2386124               | 1                | 2               | 1                | 12           | 0                        |
| MAG085  | g_Paenibacillus_C   | s_MAG085                       | 96.15            | 2.54              | 30                | 241474                | 5                | 6               | 5                | 3            | 10                       |
| MAG086  | g_Streptococcus     | s_Streptococcus alactolyticus  | 96.10            | 5.31              | 1                 | 1769744               | 3                | 3               | 3                | 14           | 0                        |
| MAG087  | g_Lactococcus       | s_Lactococcus petauri          | 96.09            | 3.05              | 8                 | 1263436               | 5                | 5               | 5                | 1            | 0                        |
| MAG088  | g>Weissella         | s>Weissella cibaria            | 96.06            | 2.49              | 1                 | 2664304               | 7                | 8               | 7                | 0            | 0                        |
| MAG089  | g_Necropsobacter    | s_Necropsobacter rosorum       | 96.05            | 0.56              | 21                | 211580                | 0                | 0               | 0                | 0            | 0                        |
| MAG090  | g>Weissella         | s>Weissella confusa            | 96.01            | 0.00              | 1                 | 2103398               | 6                | 7               | 6                | 9            | 0                        |
| MAG091  | g_CAIQBG01          | s_MAG091                       | 95.95            | 0.26              | 30                | 103305                | 0                | 0               | 0                | 0            | 0                        |
| MAG092  | g_Acinetobacter     | s_Acinetobacter johnsonii      | 95.93            | 0.66              | 32                | 379729                | 1                | 1               | 1                | 3            | 0                        |
| MAG093  | g_UBA1315           | s_MAG093                       | 95.88            | 0.00              | 66                | 71069                 | 0                | 0               | 0                | 3            | 1                        |
| MAG094  | g_Streptococcus     | s_MAG094                       | 95.82            | 2.70              | 74                | 29758                 | 0                | 0               | 0                | 0            | 0                        |
| MAG095  | g_KM106-2           | s_MAG095                       | 95.72            | 4.59              | 267               | 25327                 | 0                | 0               | 0                | 0            | 3                        |
| MAG096  | g_Ligilactobacillus | s_Ligilactobacillus salivarius | 95.61            | 0.52              | 37                | 67699                 | 0                | 1               | 0                | 0            | 0                        |
| MAG097  | g_Lactococcus       | s_Lactococcus lactis           | 95.60            | 1.04              | 1                 | 2076533               | 1                | 1               | 1                | 18           | 0                        |

| MAGs ID | genus                 | species                       | Completeness (%) | Contamination (%) | Num. of scaffolds | N50 of scaffolds (bp) | Num. of 16S rRNA | Num. of 5S rRNA | Num. of 23S rRNA | Num. of rRNA | Genes for Hemi/Cellulose |
|---------|-----------------------|-------------------------------|------------------|-------------------|-------------------|-----------------------|------------------|-----------------|------------------|--------------|--------------------------|
| MAG098  | g_Solibacillus        | s_MAG098                      | 95.36            | 1.55              | 88                | 70272                 | 0                | 0               | 0                | 0            | 0                        |
| MAG099  | g_Abiotrophia         | s_MAG099                      | 95.28            | 1.63              | 12                | 403611                | 2                | 2               | 2                | 3            | 0                        |
| MAG100  | g_Proteus             | s_Proteus mirabilis           | 95.22            | 0.08              | 345               | 13592                 | 0                | 0               | 0                | 0            | 1                        |
| MAG101  | g_Enterococcus_I      | s_MAG101                      | 95.20            | 2.54              | 106               | 38393                 | 0                | 2               | 0                | 1            | 0                        |
| MAG102  | g_Paenibacillus_B     | s_MAG102                      | 95.19            | 0.00              | 158               | 37339                 | 0                | 1               | 0                | 0            | 5                        |
| MAG103  | g_Clostridium         | s_MAG103                      | 95.17            | 0.60              | 142               | 35922                 | 0                | 1               | 0                | 0            | 0                        |
| MAG104  | g_Ligilactobacillus   | s_Ligilactobacillus murinus   | 95.10            | 0.00              | 25                | 197193                | 0                | 1               | 0                | 1            | 0                        |
| MAG105  | g_Fundicoccus         | s_MAG105                      | 95.00            | 0.45              | 140               | 24474                 | 0                | 0               | 0                | 0            | 2                        |
| MAG106  | g_Lampropedia         | s_MAG106                      | 94.76            | 0.93              | 136               | 39680                 | 0                | 0               | 0                | 0            | 0                        |
| MAG107  | g_Streptococcus       | s_Streptococcus pasteurianus  | 94.62            | 2.81              | 1                 | 2151585               | 1                | 1               | 1                | 9            | 0                        |
| MAG108  | g_Escherichia         | s_Escherichia flexneri        | 94.61            | 0.33              | 30                | 256635                | 0                | 0               | 0                | 1            | 1                        |
| MAG109  | g_MAG109              | s_MAG109                      | 94.58            | 1.57              | 108               | 42901                 | 0                | 1               | 0                | 0            | 0                        |
| MAG110  | g_Enterobacter        | s_Enterobacter mori           | 94.54            | 1.11              | 44                | 183499                | 0                | 0               | 0                | 1            | 2                        |
| MAG111  | g_Lactococcus         | s_Lactococcus garvieae        | 94.48            | 0.38              | 1                 | 1905862               | 0                | 1               | 0                | 15           | 0                        |
| MAG112  | g_Acinetobacter       | s_MAG112                      | 94.48            | 0.57              | 29                | 342642                | 1                | 2               | 0                | 2            | 0                        |
| MAG113  | g_Vagococcus_D        | s_MAG113                      | 94.37            | 3.66              | 20                | 577394                | 3                | 3               | 3                | 0            | 3                        |
| MAG114  | g_Chryseobacterium    | s_Chryseobacterium piscium    | 94.32            | 0.00              | 180               | 36017                 | 0                | 0               | 0                | 1            | 2                        |
| MAG115  | g_Lactococcus         | s_Lactococcus garvieae        | 94.27            | 0.00              | 25                | 204880                | 0                | 0               | 0                | 0            | 0                        |
| MAG116  | g_Limosilactobacillus | s_Limosilactobacillus ingluvi | 94.26            | 0.00              | 1                 | 1954091               | 1                | 1               | 1                | 10           | 0                        |
| MAG117  | g_Microbacterium      | s_MAG117                      | 94.25            | 2.82              | 5                 | 731837                | 1                | 1               | 1                | 3            | 1                        |
| MAG118  | g_Ligilactobacillus   | s_MAG118                      | 94.15            | 6.63              | 50                | 51147                 | 0                | 2               | 0                | 0            | 0                        |
| MAG119  | g_Bacillus_BN         | s_MAG119                      | 94.14            | 2.17              | 174               | 31836                 | 0                | 1               | 0                | 1            | 0                        |
| MAG120  | g_YIM-102668          | s_MAG120                      | 94.10            | 2.15              | 563               | 15007                 | 0                | 1               | 0                | 0            | 6                        |
| MAG121  | g_Enterococcus_G      | s_MAG121                      | 94.04            | 2.65              | 48                | 66411                 | 0                | 0               | 0                | 0            | 1                        |
| MAG122  | g_Sporosarcina        | s_MAG122                      | 94.04            | 2.21              | 342               | 12982                 | 0                | 0               | 0                | 0            | 1                        |
| MAG123  | g_Lactococcus         | s_Lactococcus garvieae        | 93.97            | 0.00              | 1                 | 1826339               | 0                | 1               | 0                | 15           | 0                        |
| MAG124  | g_Actinomyces         | s_MAG124                      | 93.90            | 2.37              | 53                | 106684                | 2                | 1               | 1                | 0            | 0                        |
| MAG125  | g_Conchiformibius     | s_MAG125                      | 93.89            | 0.68              | 87                | 33913                 | 0                | 0               | 0                | 0            | 0                        |
| MAG126  | g_Enterococcus        | s_Enterococcus faecalis       | 93.52            | 0.37              | 1                 | 2436969               | 1                | 1               | 1                | 6            | 1                        |
| MAG127  | g_Streptococcus       | s_MAG127                      | 93.46            | 3.06              | 99                | 31036                 | 0                | 0               | 0                | 0            | 0                        |
| MAG128  | g_Halomonas           | s_Halomonas stevensii         | 93.46            | 0.65              | 62                | 89654                 | 0                | 0               | 0                | 1            | 1                        |
| MAG129  | g_Pseudomonas_E       | s_Pseudomonas_E fragi         | 93.40            | 8.76              | 20                | 256230                | 0                | 1               | 0                | 0            | 0                        |
| MAG130  | g_Lactococcus         | s_Lactococcus lactis_E        | 93.40            | 0.38              | 52                | 118656                | 0                | 0               | 0                | 0            | 0                        |

| MAGs ID | genus                 | species                     | Completeness (%) | Contamination (%) | Num. of scaffolds | N50 of scaffolds (bp) | Num. of 16S rRNA | Num. of 5S rRNA | Num. of 23S rRNA | Num. of rRNA | Genes for Hemi/Cellulose |
|---------|-----------------------|-----------------------------|------------------|-------------------|-------------------|-----------------------|------------------|-----------------|------------------|--------------|--------------------------|
| MAG131  | g_MAG131              | s_MAG131                    | 93.37            | 0.38              | 55                | 39728                 | 1                | 0               | 1                | 0            | 0                        |
| MAG132  | g_Comamonas           | s_MAG132                    | 93.36            | 0.93              | 83                | 47570                 | 0                | 0               | 0                | 0            | 1                        |
| MAG133  | g_Enterococcus        | s_MAG133                    | 93.35            | 9.88              | 286               | 15824                 | 0                | 0               | 0                | 0            | 1                        |
| MAG134  | g_Actinomyces         | s_MAG134                    | 93.27            | 2.09              | 253               | 14165                 | 0                | 0               | 0                | 0            | 0                        |
| MAG135  | g_Comamonas           | s_MAG135                    | 93.25            | 2.10              | 259               | 24952                 | 0                | 0               | 0                | 0            | 0                        |
| MAG136  | g_Citrobacter         | s_Citrobacter portucalensis | 93.24            | 4.50              | 1                 | 4587216               | 2                | 3               | 2                | 13           | 0                        |
| MAG137  | g_Enterococcus_H      | s_Enterococcus_H canis      | 93.21            | 1.25              | 155               | 24581                 | 0                | 0               | 0                | 0            | 0                        |
| MAG138  | g_Oligella            | s_Oligella ureolytica       | 93.21            | 0.87              | 218               | 12914                 | 0                | 0               | 0                | 0            | 0                        |
| MAG139  | g_Paenalcaligenes     | s_MAG139                    | 93.18            | 0.53              | 148               | 21230                 | 0                | 0               | 0                | 0            | 0                        |
| MAG140  | g_Streptococcus       | s_Streptococcus orisratti   | 93.06            | 7.82              | 106               | 38315                 | 0                | 0               | 0                | 1            | 1                        |
| MAG141  | g_Clostridium         | s_Clostridium neonatale     | 93.05            | 0.90              | 273               | 20179                 | 0                | 0               | 0                | 0            | 2                        |
| MAG142  | g_Bacillus_BN         | s_MAG142                    | 93.03            | 2.50              | 171               | 33661                 | 0                | 0               | 0                | 0            | 0                        |
| MAG143  | g_Bacillus_BN         | s_MAG143                    | 92.99            | 1.38              | 22                | 1712780               | 5                | 5               | 5                | 6            | 0                        |
| MAG144  | g_Streptococcus       | s_Streptococcus caballi     | 92.99            | 0.37              | 53                | 67306                 | 0                | 0               | 0                | 0            | 2                        |
| MAG145  | g_Proteus             | s_Proteus sp003144405       | 92.97            | 5.95              | 47                | 131347                | 0                | 1               | 0                | 0            | 1                        |
| MAG146  | g_Enterococcus_I      | s_MAG146                    | 92.88            | 5.85              | 86                | 38551                 | 0                | 0               | 0                | 0            | 0                        |
| MAG147  | g_Acinetobacter       | s_MAG147                    | 92.80            | 1.83              | 85                | 37706                 | 0                | 1               | 0                | 0            | 0                        |
| MAG148  | g_Rothia              | s_MAG148                    | 92.44            | 4.75              | 80                | 91339                 | 1                | 2               | 1                | 4            | 0                        |
| MAG149  | g_Campylobacter_D     | s_MAG149                    | 92.41            | 1.29              | 64                | 36535                 | 0                | 0               | 0                | 0            | 0                        |
| MAG150  | g_Advenella           | s_MAG150                    | 92.38            | 0.71              | 296               | 17189                 | 0                | 0               | 0                | 0            | 0                        |
| MAG151  | g_Kluyvera            | s_Kluyvera cryocrescens     | 92.20            | 1.60              | 13                | 645847                | 1                | 1               | 1                | 12           | 1                        |
| MAG152  | g_Jeotgalibaca        | s_Jeotgalibaca porci        | 91.41            | 2.00              | 176               | 13764                 | 0                | 0               | 0                | 1            | 1                        |
| MAG153  | g_Chryseobacterium    | s_MAG153                    | 91.39            | 2.94              | 243               | 19520                 | 0                | 0               | 0                | 0            | 2                        |
| MAG154  | g_Ruminococcus_B      | s_Ruminococcus_B gnavus     | 91.14            | 1.29              | 230               | 14227                 | 0                | 0               | 0                | 0            | 2                        |
| MAG155  | g_Limosilactobacillus | s_MAG155                    | 91.09            | 7.02              | 53                | 56992                 | 0                | 1               | 0                | 0            | 0                        |
| MAG156  | g_Sphingobacterium    | s_MAG156                    | 91.07            | 4.08              | 123               | 63821                 | 0                | 0               | 0                | 0            | 3                        |
| MAG157  | g_Flavobacterium      | s_MAG157                    | 90.74            | 5.23              | 326               | 11857                 | 0                | 0               | 0                | 0            | 6                        |
| MAG158  | g_Comamonas           | s_MAG158                    | 90.53            | 3.24              | 62                | 190749                | 0                | 0               | 0                | 0            | 0                        |
| MAG159  | g_Staphylococcus_A    | s_Staphylococcus_A lentus   | 90.52            | 1.98              | 264               | 11561                 | 0                | 0               | 0                | 0            | 0                        |
| MAG160  | g_Turicibacter        | s_MAG160                    | 90.50            | 2.12              | 116               | 55609                 | 0                | 0               | 0                | 0            | 0                        |
| MAG161  | g_Turicibacter        | s_MAG161                    | 90.33            | 2.12              | 175               | 29695                 | 0                | 0               | 0                | 0            | 0                        |
| MAG162  | g_Raoultella          | s_Raoultella electrica      | 89.73            | 6.61              | 45                | 225313                | 0                | 2               | 0                | 0            | 4                        |
| MAG163  | g_Sphingobacterium    | s_Sphingobacterium cavernac | 89.63            | 0.48              | 282               | 14723                 | 0                | 0               | 0                | 0            | 3                        |



| MAGs ID | genus                  | species                        | Completeness (%) | Contamination (%) | Num. of scaffolds | N50 of scaffolds (bp) | Num. of 16S rRNA | Num. of 5S rRNA | Num. of 23S rRNA | Num. of rRNA | Genes for Hemi/Cellulose |
|---------|------------------------|--------------------------------|------------------|-------------------|-------------------|-----------------------|------------------|-----------------|------------------|--------------|--------------------------|
| MAG164  | g__Limosilactobacillus | s__Limosilactobacillus oris    | 89.50            | 0.00              | 48                | 61100                 | 0                | 0               | 0                | 0            | 0                        |
| MAG165  | g__GCA-900066495       | s__GCA-900066495 sp902362      | 89.46            | 1.23              | 355               | 9750                  | 0                | 0               | 0                | 1            | 1                        |
| MAG166  | g__Acinetobacter       | s__Acinetobacter sp00302451    | 89.23            | 5.48              | 372               | 11939                 | 0                | 0               | 0                | 0            | 0                        |
| MAG167  | g__Niabella            | s__MAG167                      | 89.23            | 1.24              | 466               | 12945                 | 0                | 0               | 0                | 0            | 9                        |
| MAG168  | g__Pseudomonas         | s__Pseudomonas aeruginosa      | 89.15            | 0.60              | 123               | 70825                 | 0                | 1               | 1                | 0            | 0                        |
| MAG169  | g__Streptococcus       | s__Streptococcus ratti         | 89.12            | 0.75              | 72                | 36933                 | 0                | 0               | 0                | 0            | 0                        |
| MAG170  | g__Stenotrophomonas    | s__MAG170                      | 89.01            | 8.26              | 115               | 169761                | 0                | 0               | 0                | 3            | 0                        |
| MAG171  | g__Cellulosilyticum    | s__MAG171                      | 88.99            | 5.93              | 338               | 17377                 | 0                | 0               | 1                | 2            | 5                        |
| MAG172  | g__Streptococcus       | s__MAG172                      | 88.79            | 3.56              | 1                 | 2041662               | 1                | 1               | 1                | 11           | 0                        |
| MAG173  | g__Streptococcus       | s__Streptococcus suis_N        | 88.47            | 0.37              | 29                | 134162                | 0                | 0               | 0                | 0            | 1                        |
| MAG174  | g__Rahnella            | s__Rahnella inusitata          | 88.40            | 2.31              | 46                | 200282                | 0                | 0               | 0                | 0            | 4                        |
| MAG175  | g__Vagococcus_E        | s__MAG175                      | 88.26            | 0.56              | 65                | 65846                 | 0                | 0               | 0                | 0            | 1                        |
| MAG176  | g__Ligilactobacillus   | s__Ligilactobacillus sp900765  | 88.22            | 1.05              | 37                | 138583                | 0                | 0               | 0                | 1            | 0                        |
| MAG177  | g__Bergeyella_A        | s__MAG177                      | 88.17            | 0.00              | 94                | 30505                 | 0                | 1               | 0                | 0            | 1                        |
| MAG178  | g__Pseudomonas_E       | s__Pseudomonas_E psychroph     | 88.10            | 6.95              | 1                 | 5739391               | 2                | 1               | 2                | 15           | 4                        |
| MAG179  | g__Streptococcus       | s__MAG179                      | 87.99            | 0.87              | 175               | 17275                 | 0                | 0               | 0                | 3            | 0                        |
| MAG180  | g__Lysinibacillus      | s__MAG180                      | 87.96            | 0.33              | 177               | 30478                 | 1                | 2               | 1                | 6            | 0                        |
| MAG181  | g__Acinetobacter       | s__MAG181                      | 87.69            | 1.85              | 143               | 25490                 | 0                | 0               | 0                | 3            | 0                        |
| MAG182  | g__Paenibacillus       | s__MAG182                      | 87.63            | 1.81              | 106               | 92310                 | 3                | 3               | 3                | 10           | 15                       |
| MAG183  | g__Oerskovia           | s__MAG183                      | 87.31            | 3.08              | 39                | 1157651               | 2                | 4               | 4                | 0            | 1                        |
| MAG184  | g__Streptococcus       | s__Streptococcus caballi       | 86.83            | 9.68              | 2                 | 1261907               | 4                | 4               | 4                | 0            | 4                        |
| MAG185  | g__Limosilactobacillus | s__Limosilactobacillus reuteri | 86.58            | 0.00              | 13                | 271211                | 1                | 1               | 1                | 0            | 0                        |
| MAG186  | g__Streptococcus       | s__Streptococcus porci         | 86.57            | 0.39              | 71                | 39670                 | 0                | 0               | 0                | 0            | 1                        |
| MAG187  | g__Acinetobacter       | s__Acinetobacter guillouiae    | 86.38            | 3.34              | 123               | 50060                 | 0                | 0               | 0                | 2            | 0                        |
| MAG188  | g__Leucobacter         | s__MAG188                      | 86.36            | 1.71              | 349               | 8521                  | 0                | 1               | 0                | 0            | 0                        |
| MAG189  | g__Streptococcus       | s__Streptococcus thermophilus  | 85.96            | 3.23              | 144               | 14845                 | 0                | 0               | 0                | 0            | 0                        |
| MAG190  | g__Microlunatus        | s__MAG190                      | 85.75            | 0.69              | 646               | 6164                  | 0                | 0               | 0                | 0            | 6                        |
| MAG191  | g__Streptococcus       | s__Streptococcus sobrinus      | 85.59            | 0.55              | 44                | 58537                 | 0                | 0               | 0                | 0            | 0                        |
| MAG192  | g__Lactococcus         | s__Lactococcus petauri         | 85.59            | 0.38              | 13                | 206583                | 0                | 1               | 0                | 0            | 0                        |
| MAG193  | g__Streptococcus       | s__MAG193                      | 85.56            | 3.20              | 106               | 16570                 | 0                | 0               | 0                | 0            | 0                        |
| MAG194  | g__Turicibacter        | s__MAG194                      | 85.47            | 3.78              | 225               | 14338                 | 0                | 0               | 0                | 0            | 0                        |
| MAG195  | g__Cetobacterium_A     | s__MAG195                      | 85.44            | 0.00              | 79                | 44862                 | 0                | 0               | 0                | 0            | 0                        |
| MAG196  | g__Clostridium         | s__MAG196                      | 85.42            | 9.73              | 20                | 394290                | 6                | 9               | 7                | 3            | 7                        |

| MAGs ID | genus                 | species                        | Completeness (%) | Contamination (%) | Num. of scaffolds | N50 of scaffolds (bp) | Num. of 16S rRNA | Num. of 5S rRNA | Num. of 23S rRNA | Num. of rRNA | Genes for Hemi/Cellulose |
|---------|-----------------------|--------------------------------|------------------|-------------------|-------------------|-----------------------|------------------|-----------------|------------------|--------------|--------------------------|
| MAG197  | g_Lacticaseibacillus  | s_Lacticaseibacillus paracase  | 85.19            | 0.00              | 41                | 115177                | 0                | 1               | 0                | 0            | 0                        |
| MAG198  | g_Pseudomonas_E       | s_Pseudomonas_E fragi          | 85.04            | 7.18              | 15                | 423117                | 0                | 0               | 0                | 1            | 0                        |
| MAG199  | g_Facklamia_A         | s_MAG199                       | 84.86            | 1.83              | 262               | 9061                  | 0                | 0               | 0                | 0            | 0                        |
| MAG200  | g_BHER01              | s_MAG200                       | 84.72            | 0.14              | 24                | 221544                | 0                | 0               | 0                | 9            | 0                        |
| MAG201  | g_Leuconostoc         | s_Leuconostoc citreum          | 84.72            | 0.35              | 1                 | 1485485               | 1                | 1               | 1                | 9            | 0                        |
| MAG202  | g_Stenotrophomonas    | s_Stenotrophomonas sp00348     | 84.65            | 5.36              | 319               | 16540                 | 0                | 0               | 0                | 3            | 1                        |
| MAG203  | g_Escherichia         | s_Escherichia flexneri         | 84.55            | 3.60              | 63                | 105555                | 0                | 2               | 0                | 0            | 1                        |
| MAG204  | g_Acinetobacter       | s_Acinetobacter portensis      | 84.48            | 5.96              | 35                | 184381                | 1                | 1               | 1                | 9            | 0                        |
| MAG205  | g_Cellvibrio          | s_MAG205                       | 84.48            | 1.72              | 68                | 139849                | 0                | 0               | 0                | 0            | 7                        |
| MAG206  | g_Lysinibacillus      | s_MAG206                       | 84.28            | 1.32              | 257               | 14830                 | 0                | 0               | 0                | 2            | 0                        |
| MAG207  | g_Streptococcus       | s_Streptococcus pasteurianus   | 83.90            | 4.87              | 14                | 193971                | 0                | 0               | 0                | 0            | 0                        |
| MAG208  | g_Bacillus_BN         | s_MAG208                       | 83.89            | 2.52              | 459               | 8309                  | 0                | 0               | 0                | 1            | 0                        |
| MAG209  | g_Comamonas           | s_MAG209                       | 83.84            | 0.93              | 202               | 44986                 | 0                | 0               | 0                | 0            | 0                        |
| MAG210  | g_Actinomyces         | s_Actinomyces slackii          | 83.78            | 1.93              | 260               | 17275                 | 0                | 1               | 0                | 0            | 0                        |
| MAG211  | g_Streptococcus       | s_MAG211                       | 83.73            | 1.25              | 47                | 45989                 | 0                | 0               | 0                | 3            | 0                        |
| MAG212  | g_Streptococcus       | s_MAG212                       | 83.49            | 3.27              | 1                 | 1971854               | 2                | 2               | 2                | 9            | 0                        |
| MAG213  | g_Comamonas           | s_MAG213                       | 83.43            | 1.95              | 512               | 7755                  | 0                | 0               | 0                | 0            | 0                        |
| MAG214  | g_Abiotrophia         | s_MAG214                       | 83.37            | 0.00              | 118               | 16519                 | 0                | 0               | 0                | 0            | 0                        |
| MAG215  | g_Acinetobacter       | s_MAG215                       | 83.30            | 3.38              | 194               | 22158                 | 0                | 0               | 0                | 0            | 0                        |
| MAG216  | g>Weissella           | s>Weissella confusa_B          | 83.03            | 3.07              | 36                | 88272                 | 0                | 3               | 0                | 0            | 0                        |
| MAG217  | g_Enterococcus_D      | s_Enterococcus_D casseliflav   | 83.02            | 1.28              | 29                | 236132                | 3                | 3               | 3                | 0            | 1                        |
| MAG218  | g_Erysipelothrix      | s_MAG218                       | 83.02            | 0.00              | 177               | 8746                  | 0                | 0               | 0                | 0            | 5                        |
| MAG219  | g_Paucilactobacillus  | s_Paucilactobacillus vaccinos  | 83.02            | 0.45              | 74                | 32849                 | 0                | 0               | 0                | 0            | 0                        |
| MAG220  | g_Clostridium_P       | s_Clostridium_P mediterrane    | 82.76            | 0.00              | 104               | 34865                 | 0                | 1               | 0                | 0            | 0                        |
| MAG221  | g_Psychrobacter       | s_Psychrobacter sanguinis      | 82.62            | 0.00              | 32                | 85144                 | 0                | 0               | 0                | 0            | 0                        |
| MAG222  | g_Dolosicoccus        | s_MAG222                       | 82.54            | 2.13              | 172               | 10474                 | 0                | 0               | 0                | 0            | 0                        |
| MAG223  | g_Terrisporobacter    | s_Terrisporobacter mayombe     | 82.24            | 0.00              | 18                | 99528                 | 0                | 0               | 0                | 1            | 0                        |
| MAG224  | g_Limosilactobacillus | s_MAG224                       | 82.07            | 0.00              | 31                | 107583                | 0                | 1               | 0                | 1            | 0                        |
| MAG225  | g_Clostridium_P       | s_Clostridium_P perfringens    | 81.63            | 0.56              | 288               | 10128                 | 0                | 0               | 0                | 1            | 0                        |
| MAG226  | g_Lactiplantibacillus | s_Lactiplantibacillus plantaru | 81.48            | 2.57              | 29                | 327951                | 1                | 2               | 1                | 0            | 0                        |
| MAG227  | g_Sphingorhabdus_C    | s_MAG227                       | 81.42            | 3.59              | 420               | 7271                  | 0                | 0               | 0                | 0            | 0                        |
| MAG228  | g_Paenalcaligenes     | s_MAG228                       | 81.42            | 0.26              | 196               | 11517                 | 0                | 0               | 0                | 0            | 0                        |
| MAG229  | g_Streptococcus       | s_MAG229                       | 81.42            | 3.85              | 64                | 46816                 | 0                | 0               | 0                | 3            | 0                        |

| MAGs ID | genus               | species                     | Completeness (%) | Contamination (%) | Num. of scaffolds | N50 of scaffolds (bp) | Num. of 16S rRNA | Num. of 5S rRNA | Num. of 23S rRNA | Num. of rRNA | Genes for Hemi/Cellulose |
|---------|---------------------|-----------------------------|------------------|-------------------|-------------------|-----------------------|------------------|-----------------|------------------|--------------|--------------------------|
| MAG230  | g_Ligilactobacillus | s_MAG230                    | 80.89            | 0.52              | 25                | 95006                 | 0                | 1               | 0                | 0            | 0                        |
| MAG231  | g_Providencia       | s_Providencia alcalifaciens | 80.69            | 0.00              | 1                 | 3253625               | 2                | 2               | 2                | 3            | 0                        |
| MAG232  | g_Streptococcus     | s_Streptococcus mitis_BO    | 80.55            | 3.78              | 93                | 21706                 | 0                | 0               | 0                | 0            | 0                        |
| MAG233  | g_Kurthia           | s_Kurthia gibsonii          | 80.42            | 6.68              | 356               | 7997                  | 0                | 0               | 0                | 1            | 0                        |
| MAG234  | g_Streptococcus     | s_Streptococcus ovis        | 80.41            | 4.32              | 92                | 27784                 | 0                | 0               | 0                | 0            | 0                        |
| MAG235  | g_Helicobacter_A    | s_MAG235                    | 80.20            | 0.47              | 20                | 152521                | 0                | 0               | 0                | 5            | 0                        |
| MAG236  | g_Ursidibacter      | s_MAG236                    | 80.14            | 6.47              | 304               | 8361                  | 0                | 0               | 0                | 1            | 0                        |
| MAG237  | g_Veillonella       | s_Veillonella sp900757715   | 80.13            | 5.60              | 168               | 9880                  | 0                | 0               | 0                | 0            | 0                        |
| MAG238  | g_Psychrobacter     | s_Psychrobacter sanguinis   | 79.91            | 0.76              | 140               | 24526                 | 0                | 0               | 0                | 0            | 0                        |
| MAG239  | g_Romboutsia_A      | s_MAG239                    | 79.66            | 6.90              | 555               | 9072                  | 0                | 3               | 0                | 3            | 2                        |
| MAG240  | g_Romboutsia        | s_MAG240                    | 79.65            | 0.35              | 351               | 5968                  | 0                | 0               | 0                | 4            | 1                        |
| MAG241  | g_Comamonas         | s_MAG241                    | 79.55            | 3.21              | 26                | 2699607               | 3                | 4               | 3                | 3            | 0                        |
| MAG242  | g_Aeromonas         | s_Aeromonas caviae          | 79.52            | 0.58              | 295               | 15939                 | 0                | 0               | 0                | 0            | 1                        |
| MAG243  | g_Streptococcus     | s_Streptococcus sobrinus    | 79.36            | 0.94              | 62                | 76482                 | 2                | 2               | 2                | 6            | 0                        |
| MAG244  | g_Streptococcus     | s_Streptococcus caballi     | 79.28            | 3.37              | 36                | 71136                 | 0                | 0               | 0                | 1            | 1                        |
| MAG245  | g_Sphingobacterium  | s_MAG245                    | 79.01            | 5.03              | 349               | 16828                 | 0                | 0               | 0                | 0            | 3                        |
| MAG246  | g_Corynebacterium   | s_Corynebacterium sp001815  | 78.98            | 1.37              | 261               | 8878                  | 0                | 0               | 0                | 1            | 0                        |
| MAG247  | g_Lysinibacillus    | s_MAG247                    | 78.04            | 1.43              | 376               | 7812                  | 0                | 0               | 0                | 0            | 0                        |
| MAG248  | g_Lactococcus       | s_Lactococcus lactis_E      | 77.81            | 0.53              | 149               | 19238                 | 0                | 0               | 0                | 0            | 1                        |
| MAG249  | g_Streptococcus     | s_Streptococcus orisratti   | 77.64            | 0.20              | 122               | 21171                 | 0                | 0               | 0                | 0            | 2                        |
| MAG250  | g_Pseudomonas_C     | s_Pseudomonas_C sp0127190   | 77.55            | 0.04              | 310               | 7274                  | 0                | 0               | 0                | 0            | 0                        |
| MAG251  | g_Acinetobacter     | s_MAG251                    | 77.23            | 4.79              | 254               | 17236                 | 1                | 1               | 1                | 0            | 0                        |
| MAG252  | g_Pseudomonas_E     | s_Pseudomonas_E bubulae     | 77.19            | 5.26              | 89                | 52092                 | 0                | 0               | 0                | 2            | 3                        |
| MAG253  | g_Streptococcus     | s_MAG253                    | 76.25            | 1.17              | 165               | 8030                  | 0                | 0               | 0                | 0            | 0                        |
| MAG254  | g_Yersinia          | s_MAG254                    | 76.21            | 0.00              | 45                | 136906                | 0                | 0               | 0                | 1            | 1                        |
| MAG255  | g_Herminiimonas     | s_MAG255                    | 75.98            | 1.30              | 369               | 6751                  | 0                | 0               | 0                | 0            | 0                        |
| MAG256  | g_Empedobacter      | s_MAG256                    | 75.42            | 9.87              | 307               | 18581                 | 0                | 0               | 0                | 0            | 6                        |
| MAG257  | g_Leuconostoc       | s_Leuconostoc lactis_A      | 75.42            | 9.73              | 9                 | 1401643               | 2                | 2               | 2                | 6            | 0                        |
| MAG258  | g_Streptococcus     | s_Streptococcus halichoeri  | 75.18            | 8.94              | 132               | 15695                 | 0                | 0               | 0                | 0            | 0                        |
| MAG259  | g_Enterococcus_B    | s_MAG259                    | 74.45            | 1.72              | 171               | 17466                 | 0                | 0               | 0                | 2            | 0                        |
| MAG260  | g_Turicibacter      | s_MAG260                    | 73.60            | 3.28              | 43                | 69150                 | 0                | 0               | 0                | 0            | 0                        |
| MAG261  | g_Sphingobacterium  | s_MAG261                    | 73.54            | 0.00              | 69                | 56514                 | 1                | 1               | 1                | 9            | 2                        |
| MAG262  | g_Providencia       | s_Providencia alcalifaciens | 73.41            | 1.18              | 7                 | 2699704               | 3                | 3               | 3                | 0            | 0                        |

| MAGs ID | genus              | species                      | Completeness (%) | Contamination (%) | Num. of scaffolds | N50 of scaffolds (bp) | Num. of 16S rRNA | Num. of 5S rRNA | Num. of 23S rRNA | Num. of rRNA | Genes for Hemi/Cellulose |
|---------|--------------------|------------------------------|------------------|-------------------|-------------------|-----------------------|------------------|-----------------|------------------|--------------|--------------------------|
| MAG263  | g_Lelliottia       | s_Lelliottia jeotgali        | 73.11            | 1.44              | 6                 | 671239                | 1                | 2               | 1                | 18           | 4                        |
| MAG264  | g_Lysinibacillus   | s_MAG264                     | 72.85            | 1.55              | 24                | 157887                | 0                | 6               | 0                | 1            | 0                        |
| MAG265  | g_Neisseria        | s_MAG265                     | 72.84            | 1.97              | 241               | 8603                  | 0                | 0               | 0                | 0            | 0                        |
| MAG266  | g_Streptococcus    | s_Streptococcus caballi      | 72.58            | 7.38              | 52                | 72790                 | 0                | 0               | 0                | 0            | 0                        |
| MAG267  | g_Lactobacillus    | s_Lactobacillus johnsonii    | 72.41            | 9.48              | 244               | 8102                  | 0                | 0               | 0                | 1            | 0                        |
| MAG268  | g_Clostridium      | s_Clostridium thermobutyricu | 72.41            | 0.00              | 7                 | 2435311               | 4                | 6               | 4                | 4            | 0                        |
| MAG269  | g_Clostridium_P    | s_MAG269                     | 72.41            | 0.00              | 24                | 126939                | 0                | 1               | 0                | 1            | 0                        |
| MAG270  | g_Atopostipes      | s_MAG270                     | 72.25            | 1.69              | 233               | 7013                  | 0                | 0               | 0                | 0            | 1                        |
| MAG271  | g_Acinetobacter    | s_MAG271                     | 72.05            | 0.00              | 318               | 11383                 | 0                | 0               | 0                | 0            | 0                        |
| MAG272  | g_Acinetobacter    | s_Acinetobacter johnsonii    | 71.98            | 2.17              | 483               | 5068                  | 0                | 0               | 0                | 0            | 0                        |
| MAG273  | g_Streptococcus    | s_MAG273                     | 71.46            | 0.78              | 151               | 11982                 | 0                | 1               | 0                | 0            | 0                        |
| MAG274  | g_Pantoea          | s_Pantoea ananatis           | 71.19            | 3.45              | 313               | 20872                 | 0                | 0               | 0                | 0            | 4                        |
| MAG275  | g_Acinetobacter    | s_MAG275                     | 71.19            | 1.72              | 336               | 10264                 | 0                | 0               | 0                | 0            | 0                        |
| MAG276  | g_Plesiomonas      | s_Plesiomonas shigelloides   | 70.90            | 1.13              | 14                | 210134                | 5                | 5               | 5                | 16           | 1                        |
| MAG277  | g_Enterococcus_A   | s_Enterococcus_A avium       | 70.79            | 4.85              | 371               | 11545                 | 0                | 0               | 0                | 0            | 0                        |
| MAG278  | g_Acinetobacter    | s_Acinetobacter sp00236745'  | 70.69            | 9.48              | 75                | 43770                 | 0                | 0               | 0                | 0            | 0                        |
| MAG279  | g_Vagococcus_D     | s_MAG279                     | 70.69            | 6.03              | 92                | 416804                | 2                | 3               | 2                | 0            | 1                        |
| MAG280  | g_Sporosarcina     | s_Sporosarcina ureae_C       | 70.69            | 1.72              | 244               | 16324                 | 0                | 0               | 0                | 1            | 2                        |
| MAG281  | g_Terrisporobacter | s_Terrisporobacter mayombe   | 70.69            | 1.72              | 42                | 92372                 | 0                | 0               | 0                | 9            | 2                        |
| MAG282  | g_Acinetobacter    | s_Acinetobacter townneri     | 70.64            | 2.59              | 172               | 25012                 | 0                | 0               | 0                | 0            | 0                        |
| MAG283  | g_Serratia         | s_Serratia ureilytica        | 70.52            | 0.00              | 1                 | 3299453               | 3                | 4               | 3                | 9            | 1                        |
| MAG284  | g_Streptococcus    | s_Streptococcus ferus        | 70.45            | 0.00              | 95                | 19193                 | 0                | 0               | 0                | 0            | 0                        |
| MAG285  | g_Klebsiella       | s_Klebsiella pneumoniae      | 70.23            | 5.01              | 18                | 645200                | 0                | 0               | 0                | 16           | 3                        |
| MAG286  | g_Atopostipes      | s_MAG286                     | 70.14            | 0.00              | 195               | 6969                  | 0                | 0               | 0                | 1            | 0                        |
| MAG287  | g_Clostridium      | s_Clostridium butyricum      | 70.13            | 5.17              | 573               | 6748                  | 0                | 1               | 0                | 0            | 0                        |
| MAG288  | g_Acinetobacter    | s_Acinetobacter gandensis    | 70.07            | 3.66              | 37                | 108608                | 0                | 0               | 0                | 0            | 0                        |
| MAG289  | g_MAG289           | s_MAG289                     | 70.03            | 1.94              | 436               | 5168                  | 0                | 0               | 0                | 0            | 4                        |
| MAG290  | g_Jeotgalicoccus   | s_MAG290                     | 69.40            | 1.34              | 230               | 6822                  | 0                | 0               | 0                | 0            | 0                        |
| MAG291  | g_Abiotrophia      | s_MAG291                     | 69.34            | 1.90              | 59                | 32064                 | 0                | 0               | 0                | 0            | 0                        |
| MAG292  | g_Pseudomonas_C    | s_MAG292                     | 69.31            | 1.72              | 257               | 10502                 | 0                | 0               | 0                | 0            | 0                        |
| MAG293  | g_Lactococcus      | s_Lactococcus lactis         | 69.14            | 4.45              | 1                 | 1687929               | 4                | 4               | 4                | 1            | 0                        |
| MAG294  | g_Clostridium      | s_Clostridium paraputrificum | 69.06            | 1.56              | 383               | 5408                  | 0                | 1               | 0                | 1            | 0                        |
| MAG295  | g_Pediococcus      | s_Pediococcus pentosaceus    | 68.97            | 0.00              | 3                 | 406260                | 0                | 0               | 0                | 0            | 0                        |

| MAGs ID | genus                    | species                      | Completeness (%) | Contamination (%) | Num. of scaffolds | N50 of scaffolds (bp) | Num. of 16S rRNA | Num. of 5S rRNA | Num. of 23S rRNA | Num. of rRNA | Genes for Hemi/Cellulose |
|---------|--------------------------|------------------------------|------------------|-------------------|-------------------|-----------------------|------------------|-----------------|------------------|--------------|--------------------------|
| MAG296  | g_Chryseobacterium       | s_MAG296                     | 68.83            | 6.03              | 273               | 8097                  | 0                | 1               | 0                | 0            | 0                        |
| MAG297  | g_Chryseobacterium       | s_Chryseobacterium sp00129   | 68.76            | 3.45              | 492               | 15501                 | 0                | 0               | 0                | 0            | 1                        |
| MAG298  | g_Helicobacter_A         | s_MAG298                     | 68.19            | 0.12              | 77                | 26695                 | 0                | 0               | 0                | 0            | 0                        |
| MAG299  | g_Weissella              | s_Weissella cibaria          | 67.89            | 0.00              | 219               | 10425                 | 0                | 0               | 0                | 0            | 0                        |
| MAG300  | g_Enterococcus_I         | s_Enterococcus_I aquimarinu  | 67.63            | 0.22              | 194               | 7095                  | 0                | 2               | 0                | 0            | 0                        |
| MAG301  | g_Microlunatus           | s_MAG301                     | 67.32            | 2.07              | 526               | 6701                  | 0                | 0               | 0                | 0            | 3                        |
| MAG302  | g_Stenotrophomonas       | s_MAG302                     | 67.24            | 1.72              | 210               | 22829                 | 0                | 0               | 0                | 0            | 0                        |
| MAG303  | g_Cetobacterium_A        | s_Cetobacterium_A somerae    | 67.24            | 0.00              | 8                 | 342115                | 0                | 1               | 0                | 0            | 0                        |
| MAG304  | g_Helicobacter_A         | s_Helicobacter_A muridarum   | 67.03            | 0.77              | 253               | 5682                  | 0                | 0               | 0                | 0            | 0                        |
| MAG305  | g_VLXZ01                 | s_MAG305                     | 67.00            | 5.50              | 436               | 6127                  | 0                | 1               | 0                | 1            | 1                        |
| MAG306  | g_Citrobacter            | s_Citrobacter murlinae       | 66.82            | 0.85              | 27                | 225640                | 0                | 2               | 0                | 3            | 0                        |
| MAG307  | g_Ursidibacter           | s_MAG307                     | 66.81            | 0.80              | 258               | 6874                  | 0                | 0               | 0                | 0            | 0                        |
| MAG308  | g_Jeotgalicoccus         | s_Jeotgalicoccus nanhaiensis | 66.70            | 0.77              | 216               | 7796                  | 0                | 0               | 0                | 0            | 0                        |
| MAG309  | g_Enterococcus_C         | s_Enterococcus_C sp0099331   | 66.70            | 1.72              | 365               | 6221                  | 0                | 0               | 0                | 0            | 1                        |
| MAG310  | g_Sphingobacterium       | s_MAG310                     | 66.55            | 0.00              | 262               | 13035                 | 0                | 0               | 0                | 0            | 1                        |
| MAG311  | g_Lactococcus            | s_Lactococcus lactis         | 66.38            | 7.48              | 8                 | 484350                | 2                | 2               | 2                | 4            | 0                        |
| MAG312  | g_Leuconostoc            | s_Leuconostoc lactis         | 66.22            | 9.72              | 30                | 158003                | 0                | 0               | 0                | 0            | 0                        |
| MAG313  | g_Empedobacter           | s_MAG313                     | 65.59            | 0.00              | 99                | 20264                 | 0                | 0               | 0                | 0            | 1                        |
| MAG314  | g_Klebsiella             | s_Klebsiella pneumoniae      | 65.52            | 5.17              | 24                | 360915                | 2                | 2               | 2                | 3            | 0                        |
| MAG315  | g_Lelliottia             | s_MAG315                     | 65.52            | 0.00              | 3                 | 3891227               | 3                | 3               | 3                | 12           | 6                        |
| MAG316  | g_Bacillus_BN            | s_MAG316                     | 65.52            | 0.00              | 1                 | 2276866               | 1                | 1               | 1                | 1            | 0                        |
| MAG317  | g_Lactobacillus          | s_Lactobacillus kitasatonis  | 64.61            | 0.00              | 8                 | 348923                | 0                | 0               | 0                | 0            | 0                        |
| MAG318  | g_Providencia            | s_MAG318                     | 64.17            | 4.49              | 7                 | 659577                | 3                | 4               | 3                | 6            | 0                        |
| MAG319  | g_MAG319                 | s_MAG319                     | 63.96            | 1.91              | 83                | 49854                 | 3                | 3               | 3                | 3            | 1                        |
| MAG320  | g_Enterobacter           | s_Enterobacter hormaechei_A  | 63.95            | 5.17              | 229               | 32623                 | 0                | 0               | 0                | 2            | 1                        |
| MAG321  | g_Clostridium            | s_MAG321                     | 63.79            | 1.72              | 121               | 24570                 | 0                | 0               | 0                | 0            | 0                        |
| MAG322  | g_Acinetobacter          | s_Acinetobacter baumannii    | 63.79            | 0.00              | 164               | 20400                 | 0                | 0               | 0                | 0            | 0                        |
| MAG323  | g_Kosakonia              | s_Kosakonia cowanii          | 63.75            | 5.17              | 75                | 133227                | 0                | 2               | 0                | 3            | 2                        |
| MAG324  | g_Paeniglutamicibacteris | s_MAG324                     | 63.40            | 0.86              | 556               | 8846                  | 0                | 0               | 0                | 0            | 0                        |
| MAG325  | g_Acinetobacter          | s_MAG325                     | 63.28            | 1.72              | 263               | 20354                 | 0                | 0               | 0                | 0            | 0                        |
| MAG326  | g_Pseudomonas_E          | s_Pseudomonas_E fragi        | 63.16            | 0.00              | 32                | 412599                | 1                | 1               | 1                | 3            | 1                        |
| MAG327  | g_Clostridium            | s_MAG327                     | 63.04            | 2.53              | 125               | 24895                 | 0                | 0               | 0                | 0            | 1                        |
| MAG328  | g_Enterococcus_B         | s_Enterococcus_B faecium     | 62.92            | 0.00              | 33                | 82242                 | 0                | 0               | 0                | 0            | 0                        |

| MAGs ID | genus                 | species                       | Completeness (%) | Contamination (%) | Num. of scaffolds | N50 of scaffolds (bp) | Num. of 16S rRNA | Num. of 5S rRNA | Num. of 23S rRNA | Num. of rRNA | Genes for Hemi/Cellulose |
|---------|-----------------------|-------------------------------|------------------|-------------------|-------------------|-----------------------|------------------|-----------------|------------------|--------------|--------------------------|
| MAG329  | g_Timonella           | s_MAG329                      | 62.35            | 0.00              | 236               | 7535                  | 0                | 0               | 0                | 0            | 0                        |
| MAG330  | g_Pseudomonas_E       | s_MAG330                      | 62.24            | 2.07              | 689               | 7072                  | 0                | 0               | 0                | 0            | 0                        |
| MAG331  | g_Lelliottia          | s_MAG331                      | 62.07            | 5.17              | 177               | 33903                 | 0                | 0               | 0                | 0            | 0                        |
| MAG332  | g_Acinetobacter       | s_Acinetobacter albensis      | 62.07            | 0.00              | 320               | 9045                  | 0                | 1               | 0                | 1            | 0                        |
| MAG333  | g_Sphingobacterium    | s_Sphingobacterium nematoc    | 61.55            | 0.00              | 333               | 10107                 | 0                | 0               | 0                | 0            | 2                        |
| MAG334  | g_Lactobacillus       | s_MAG334                      | 61.21            | 0.00              | 95                | 30058                 | 0                | 0               | 0                | 3            | 0                        |
| MAG335  | g_Vagococcus_D        | s_MAG335                      | 61.18            | 4.25              | 576               | 11521                 | 0                | 0               | 0                | 0            | 5                        |
| MAG336  | g_Klebsiella          | s_Klebsiella variicola        | 60.85            | 0.00              | 62                | 154041                | 0                | 0               | 0                | 0            | 2                        |
| MAG337  | g_Acinetobacter       | s_MAG337                      | 60.83            | 8.09              | 47                | 186479                | 0                | 0               | 0                | 3            | 0                        |
| MAG338  | g_Buttiauxella        | s_MAG338                      | 60.69            | 1.72              | 84                | 139276                | 0                | 0               | 0                | 0            | 2                        |
| MAG339  | g_Enterococcus_A      | s_Enterococcus_A avium        | 60.69            | 2.31              | 112               | 51137                 | 2                | 2               | 2                | 2            | 0                        |
| MAG340  | g_Lactococcus         | s_Lactococcus lactis          | 60.67            | 7.20              | 44                | 63093                 | 1                | 2               | 1                | 12           | 0                        |
| MAG341  | g>Weissella           | s>Weissella confusa           | 60.53            | 0.00              | 152               | 16558                 | 0                | 1               | 0                | 0            | 0                        |
| MAG342  | g_Lactobacillus       | s_Lactobacillus acidophilus   | 60.37            | 3.04              | 22                | 91293                 | 1                | 1               | 1                | 6            | 0                        |
| MAG343  | g_Paenibacillus       | s_MAG343                      | 60.34            | 1.72              | 240               | 27411                 | 0                | 0               | 0                | 3            | 7                        |
| MAG344  | g_Escherichia         | s_Escherichia dysenteriae     | 60.34            | 1.72              | 44                | 86088                 | 0                | 0               | 0                | 1            | 2                        |
| MAG345  | g_MAG345              | s_MAG345                      | 60.31            | 1.00              | 250               | 5088                  | 0                | 1               | 0                | 0            | 0                        |
| MAG346  | g_Bacillus_BN         | s_MAG346                      | 60.18            | 7.74              | 14                | 474957                | 1                | 4               | 2                | 10           | 0                        |
| MAG347  | g_Comamonas           | s_MAG347                      | 60.13            | 0.36              | 7                 | 403011                | 0                | 0               | 0                | 0            | 0                        |
| MAG348  | g_Hafnia              | s_Hafnia alvei                | 60.09            | 1.78              | 78                | 51258                 | 0                | 1               | 0                | 0            | 2                        |
| MAG349  | g_Lysinibacillus      | s_MAG349                      | 59.65            | 7.02              | 82                | 50681                 | 0                | 0               | 0                | 1            | 0                        |
| MAG350  | g_Cellulosilyticum    | s_MAG350                      | 59.65            | 0.00              | 45                | 47445                 | 0                | 0               | 0                | 0            | 0                        |
| MAG351  | g_Pseudomonas_E       | s_MAG351                      | 59.62            | 4.18              | 23                | 142107                | 0                | 1               | 0                | 3            | 0                        |
| MAG352  | g_Oerskovia           | s_MAG352                      | 59.55            | 5.88              | 1708              | 4039                  | 0                | 0               | 0                | 0            | 0                        |
| MAG353  | g_Paracoccus          | s_MAG353                      | 59.25            | 3.52              | 592               | 4690                  | 0                | 0               | 0                | 0            | 0                        |
| MAG354  | g_Enterococcus_B      | s_Enterococcus_B pernyi       | 58.62            | 6.90              | 9                 | 176196                | 0                | 0               | 0                | 0            | 0                        |
| MAG355  | g_Turicibacter        | s_MAG355                      | 58.62            | 0.00              | 313               | 10719                 | 0                | 0               | 0                | 0            | 0                        |
| MAG356  | g_Campylobacter_D     | s_MAG356                      | 58.62            | 0.00              | 55                | 33628                 | 0                | 0               | 0                | 0            | 0                        |
| MAG357  | g_Vagococcus_D        | s_Vagococcus_D salmoninar     | 58.22            | 0.86              | 20                | 340862                | 5                | 6               | 5                | 0            | 0                        |
| MAG358  | g_Cellulosilyticum    | s_MAG358                      | 57.89            | 3.51              | 32                | 69576                 | 0                | 0               | 0                | 0            | 2                        |
| MAG359  | g_Limosilactobacillus | s_Limosilactobacillus reuteri | 57.44            | 2.30              | 20                | 125380                | 0                | 0               | 0                | 0            | 0                        |
| MAG360  | g_YIM-102668          | s_MAG360                      | 57.35            | 0.00              | 327               | 4341                  | 0                | 0               | 0                | 0            | 1                        |
| MAG361  | g_Acinetobacter       | s_MAG361                      | 57.35            | 0.00              | 126               | 18224                 | 0                | 0               | 0                | 0            | 0                        |

| MAGs ID | genus              | species                     | Completeness (%) | Contamination (%) | Num. of scaffolds | N50 of scaffolds (bp) | Num. of 16S rRNA | Num. of 5S rRNA | Num. of 23S rRNA | Num. of rRNA | Genes for Hemi/Cellulose |
|---------|--------------------|-----------------------------|------------------|-------------------|-------------------|-----------------------|------------------|-----------------|------------------|--------------|--------------------------|
| MAG362  | g_Terrisporobacter | s_MAG362                    | 57.24            | 0.00              | 541               | 6874                  | 0                | 0               | 0                | 3            | 0                        |
| MAG363  | g_Pseudomonas_E    | s_MAG363                    | 57.02            | 0.00              | 215               | 31711                 | 0                | 0               | 0                | 0            | 2                        |
| MAG364  | g_Comamonas        | s_MAG364                    | 56.71            | 9.76              | 193               | 35944                 | 0                | 0               | 0                | 0            | 0                        |
| MAG365  | g_MAG365           | s_MAG365                    | 56.44            | 0.98              | 288               | 7590                  | 0                | 0               | 0                | 0            | 0                        |
| MAG366  | g_Chryseobacterium | s_MAG366                    | 56.27            | 4.00              | 313               | 10108                 | 0                | 0               | 0                | 0            | 0                        |
| MAG367  | g_Necropsobacter   | s_Necropsobacter rosorum    | 56.26            | 0.69              | 122               | 16160                 | 0                | 0               | 0                | 0            | 0                        |
| MAG368  | g_Chryseobacterium | s_MAG368                    | 56.23            | 0.98              | 74                | 62092                 | 0                | 0               | 0                | 0            | 0                        |
| MAG369  | g_Citrobacter      | s_Citrobacter portucalensis | 56.19            | 1.72              | 66                | 108595                | 0                | 1               | 0                | 1            | 0                        |
| MAG370  | g_Acinetobacter    | s_MAG370                    | 56.03            | 2.59              | 92                | 52934                 | 0                | 0               | 0                | 5            | 0                        |
| MAG371  | g_Basfia_A         | s_MAG371                    | 56.03            | 0.56              | 5                 | 771672                | 4                | 6               | 4                | 0            | 0                        |
| MAG372  | g_Conchiformibius  | s_MAG372                    | 56.01            | 0.79              | 69                | 27774                 | 1                | 1               | 1                | 3            | 0                        |
| MAG373  | g_Carnobacterium   | s_Carnobacterium maltaroma  | 55.95            | 1.73              | 38                | 80493                 | 1                | 1               | 1                | 0            | 2                        |
| MAG374  | g_Hafnia           | s_Hafnia proteus            | 55.64            | 1.72              | 177               | 41335                 | 3                | 3               | 3                | 4            | 3                        |
| MAG375  | g_Klebsiella_A     | s_Klebsiella_A oxytoca      | 55.42            | 8.77              | 194               | 43797                 | 0                | 0               | 0                | 0            | 1                        |
| MAG376  | g_Pseudomonas_E    | s_Pseudomonas_E parafulva   | 54.74            | 0.00              | 542               | 8280                  | 0                | 1               | 0                | 0            | 0                        |
| MAG377  | g_Glutamicibacter  | s_Glutamicibacter sp0029798 | 54.47            | 0.00              | 335               | 13520                 | 0                | 0               | 0                | 0            | 2                        |
| MAG378  | g_Pseudomonas_E    | s_Pseudomonas_E lundensis   | 54.39            | 1.75              | 154               | 24814                 | 0                | 0               | 0                | 0            | 0                        |
| MAG379  | g_Acinetobacter    | s_Acinetobacter baumannii   | 54.31            | 6.90              | 217               | 13952                 | 0                | 0               | 0                | 0            | 0                        |
| MAG380  | g_Acinetobacter    | s_MAG380                    | 54.31            | 1.72              | 128               | 26958                 | 1                | 1               | 1                | 0            | 0                        |
| MAG381  | g_Arthrobacter_A   | s_MAG381                    | 54.31            | 0.00              | 478               | 5096                  | 0                | 0               | 0                | 0            | 0                        |
| MAG382  | g_MAG382           | s_MAG382                    | 54.30            | 0.88              | 103               | 27123                 | 0                | 0               | 0                | 3            | 0                        |
| MAG383  | g_Serratia         | s_Serratia marcescens_I     | 53.95            | 1.72              | 28                | 198171                | 0                | 0               | 0                | 1            | 1                        |
| MAG384  | g_Erwinia          | s_Erwinia sp001422605       | 53.61            | 0.00              | 489               | 10830                 | 0                | 0               | 0                | 0            | 2                        |
| MAG385  | g_Pantoea          | s_MAG385                    | 53.61            | 0.00              | 696               | 4467                  | 0                | 0               | 0                | 0            | 1                        |
| MAG386  | g_Stenotrophomonas | s_Stenotrophomonas sp00308  | 53.45            | 6.90              | 700               | 3875                  | 0                | 0               | 0                | 0            | 2                        |
| MAG387  | g_Sphingobacterium | s_MAG387                    | 53.45            | 5.17              | 416               | 9289                  | 0                | 0               | 0                | 0            | 1                        |
| MAG388  | g_Acinetobacter    | s_Acinetobacter sp00371139  | 53.45            | 1.72              | 322               | 8464                  | 0                | 0               | 0                | 0            | 0                        |
| MAG389  | g_Clostridium      | s_MAG389                    | 53.45            | 1.72              | 14                | 242122                | 0                | 0               | 0                | 0            | 1                        |
| MAG390  | g_Escherichia      | s_Escherichia coli          | 53.45            | 0.00              | 15                | 572323                | 0                | 0               | 0                | 0            | 1                        |
| MAG391  | g_Acinetobacter    | s_MAG391                    | 53.32            | 2.89              | 76                | 63739                 | 0                | 0               | 0                | 3            | 0                        |
| MAG392  | g_MAG392           | s_MAG392                    | 53.16            | 1.27              | 20                | 117292                | 0                | 0               | 0                | 0            | 0                        |
| MAG393  | g_Pseudomonas_E    | s_Pseudomonas_E qingdaone   | 52.63            | 1.75              | 62                | 63567                 | 0                | 1               | 0                | 0            | 1                        |
| MAG394  | g_Weissella        | s_Weissella cibaria         | 52.63            | 0.00              | 64                | 46090                 | 0                | 0               | 0                | 0            | 0                        |

| MAGs ID | genus              | species                      | Completeness (%) | Contamination (%) | Num. of scaffolds | N50 of scaffolds (bp) | Num. of 16S rRNA | Num. of 5S rRNA | Num. of 23S rRNA | Num. of rRNA | Genes for Hemi/Cellulose |
|---------|--------------------|------------------------------|------------------|-------------------|-------------------|-----------------------|------------------|-----------------|------------------|--------------|--------------------------|
| MAG395  | g_Enterococcus_B   | s_MAG395                     | 52.07            | 6.90              | 550               | 5122                  | 0                | 0               | 0                | 0            | 5                        |
| MAG396  | g_Arthrobacter_A   | s_MAG396                     | 51.75            | 1.72              | 445               | 8282                  | 0                | 0               | 0                | 0            | 1                        |
| MAG397  | g_Pseudomonas_C    | s_MAG397                     | 51.72            | 0.86              | 334               | 6909                  | 0                | 0               | 0                | 0            | 1                        |
| MAG398  | g_Staphylococcus_A | s_Staphylococcus_A_pasteuri  | 51.72            | 0.00              | 314               | 6310                  | 0                | 0               | 0                | 0            | 0                        |
| MAG399  | g_Streptococcus    | s_Streptococcus_oristratti   | 51.72            | 0.00              | 2                 | 953386                | 1                | 1               | 1                | 0            | 1                        |
| MAG400  | g_Comamonas        | s_MAG400                     | 51.10            | 0.93              | 74                | 95421                 | 0                | 0               | 0                | 0            | 0                        |
| MAG401  | g_Raoultella       | s_Raoultella_ornithinolytica | 50.88            | 8.77              | 206               | 41508                 | 0                | 0               | 0                | 0            | 4                        |
| MAG402  | g_Escherichia      | s_Escherichia_marmotae       | 50.86            | 1.72              | 81                | 172898                | 0                | 1               | 0                | 0            | 1                        |
| MAG403  | g_Abiotrophia      | s_MAG403                     | 50.78            | 0.00              | 69                | 22230                 | 0                | 0               | 0                | 0            | 0                        |
| MAG404  | g_Kluyvera         | s_Kluyvera_cryocrescens      | 50.43            | 0.49              | 2                 | 1554579               | 5                | 6               | 4                | 4            | 2                        |
| MAG405  | g_Paenacaligenes   | s_Paenacaligenes_sp0128395   | 50.17            | 1.72              | 211               | 5936                  | 0                | 0               | 0                | 0            | 0                        |
| MAG406  | g_Klebsiella       | s_Klebsiella_quasipneumonia  | 50.00            | 3.45              | 83                | 247392                | 0                | 0               | 0                | 6            | 2                        |
| MAG407  | g_Lactococcus      | s_Lactococcus_lactis_E       | 50.00            | 3.30              | 22                | 112343                | 0                | 1               | 0                | 0            | 1                        |
| MAG408  | g_Klebsiella       | s_Klebsiella_aerogenes       | 50.00            | 0.00              | 28                | 205175                | 0                | 0               | 0                | 1            | 1                        |



| MAGs ID | genus                      | species                               | Completeness (%) | Contamination (%) | Num. of scaffolds | N50 of scaffolds (bp) | Num. of 16S rRNA | Num. of 5S rRNA | Num. of 23S rRNA | Num. of rRNA |
|---------|----------------------------|---------------------------------------|------------------|-------------------|-------------------|-----------------------|------------------|-----------------|------------------|--------------|
| MAG389  | <i>g__Clostridium</i>      | <i>s__MAG389</i>                      | 53.448           | 1.724             | 14                | 242122                | 0                | 0               | 0                | 0            |
| MAG390  | <i>g__Escherichia</i>      | <i>s__Escherichia coli</i>            | 53.448           | 0.000             | 15                | 572323                | 0                | 0               | 0                | 0            |
| MAG391  | <i>g__Acinetobacter</i>    | <i>s__MAG391</i>                      | 53.321           | 2.893             | 76                | 63739                 | 0                | 0               | 0                | 3            |
| MAG392  | <i>g__MAG392</i>           | <i>s__MAG392</i>                      | 53.165           | 1.266             | 20                | 117292                | 0                | 0               | 0                | 0            |
| MAG393  | <i>g__Pseudomonas_E</i>    | <i>s__Pseudomonas_E qingdaonensis</i> | 52.632           | 1.754             | 62                | 63567                 | 0                | 1               | 0                | 0            |
| MAG394  | <i>g__Weissella</i>        | <i>s__Weissella cibaria</i>           | 52.632           | 0.000             | 64                | 46090                 | 0                | 0               | 0                | 0            |
| MAG395  | <i>g__Enterococcus_B</i>   | <i>s__MAG395</i>                      | 52.069           | 6.897             | 550               | 5122                  | 0                | 0               | 0                | 0            |
| MAG396  | <i>g__Arthrobacter_A</i>   | <i>s__MAG396</i>                      | 51.750           | 1.724             | 445               | 8282                  | 0                | 0               | 0                | 0            |
| MAG397  | <i>g__Pseudomonas_C</i>    | <i>s__MAG397</i>                      | 51.724           | 0.862             | 334               | 6909                  | 0                | 0               | 0                | 0            |
| MAG398  | <i>g__Staphylococcus_A</i> | <i>s__Staphylococcus_A pasteurii</i>  | 51.724           | 0.000             | 314               | 6310                  | 0                | 0               | 0                | 0            |
| MAG399  | <i>g__Streptococcus</i>    | <i>s__Streptococcus orisratti</i>     | 51.724           | 0.000             | 2                 | 953386                | 1                | 1               | 1                | 0            |
| MAG400  | <i>g__Comamonas</i>        | <i>s__MAG400</i>                      | 51.096           | 0.929             | 74                | 95421                 | 0                | 0               | 0                | 0            |
| MAG401  | <i>g__Raoultella</i>       | <i>s__Raoultella ornithinolytica</i>  | 50.877           | 8.772             | 206               | 41508                 | 0                | 0               | 0                | 0            |
| MAG402  | <i>g__Escherichia</i>      | <i>s__Escherichia marmotae</i>        | 50.862           | 1.724             | 81                | 172898                | 0                | 1               | 0                | 0            |
| MAG403  | <i>g__Abiotrophia</i>      | <i>s__MAG403</i>                      | 50.784           | 0.000             | 69                | 22230                 | 0                | 0               | 0                | 0            |
| MAG404  | <i>g__Kluyvera</i>         | <i>s__Kluyvera cryocrescens</i>       | 50.430           | 0.489             | 2                 | 1554579               | 5                | 6               | 4                | 4            |
| MAG405  | <i>g__Paenalcaligenes</i>  | <i>s__Paenalcaligenes sp012839585</i> | 50.172           | 1.724             | 211               | 5936                  | 0                | 0               | 0                | 0            |
| MAG406  | <i>g__Klebsiella</i>       | <i>s__Klebsiella quasipneumoniae</i>  | 50.000           | 3.448             | 83                | 247392                | 0                | 0               | 0                | 6            |
| MAG407  | <i>g__Lactococcus</i>      | <i>s__Lactococcus lactis_E</i>        | 50.000           | 3.302             | 22                | 112343                | 0                | 1               | 0                | 0            |
| MAG408  | <i>g__Klebsiella</i>       | <i>s__Klebsiella aerogenes</i>        | 50.000           | 0.000             | 28                | 205175                | 0                | 0               | 0                | 1            |

**Table S3. Metatranscriptomic sequencing profile of selected samples**

| SampleID | # of RawReads | # of clean reads<br>(paired) | # of nonRNA<br>reads | Reads length | RawData (bp) | nonRNA bases (bp) |
|----------|---------------|------------------------------|----------------------|--------------|--------------|-------------------|
| DD10T    | 30968938      | 28202412                     | 27253403             | 150          | 9290681400   | 8176020900        |
| DD2T     | 35744545      | 33927330                     | 33453227             | 150          | 10723363500  | 10035968100       |
| DD4T     | 36071935      | 33375153                     | 32515007             | 150          | 10821580500  | 9754502100        |
| DD8T     | 35830128      | 30125253                     | 29293653             | 150          | 10749038400  | 8788095900        |
| DG1T     | 36382723      | 34406187                     | 33533473             | 150          | 10914816900  | 10060041900       |
| DG3T     | 39351470      | 37287982                     | 36518295             | 150          | 11805441000  | 10955488500       |
| DG4T     | 40981324      | 35587300                     | 34217993             | 150          | 12294397200  | 10265397900       |
| DG5T     | 38538014      | 36329171                     | 35210671             | 150          | 11561404200  | 10563201300       |
| DJ1T     | 32835620      | 29894686                     | 29192954             | 150          | 9850686000   | 8757886200        |
| DJ2T     | 33100432      | 30854042                     | 30108718             | 150          | 9930129600   | 9032615400        |
| DJ4T     | 34926831      | 32847326                     | 31880960             | 150          | 10478049300  | 9564288000        |
| DJ5T     | 31466718      | 26648618                     | 26138023             | 150          | 9440015400   | 7841406900        |
| DJ6T     | 41643000      | 39051613                     | 37594357             | 150          | 12492900000  | 11278307100       |
| DJ7T     | 45256504      | 42858372                     | 41934164             | 150          | 13576951200  | 12580249200       |

**Table S4 Selected enzymes linked with cellulose degradation, amino acid degradation, and amino acid biosynthesis**

| Cellulose degradation related ENZYME entry | Amino acid degradation related ENZYME entry |             | Amino acid byosynthesis related ENZYME entry |              |
|--------------------------------------------|---------------------------------------------|-------------|----------------------------------------------|--------------|
| EC 1.1.3.7                                 | EC 1.1.1.157                                | EC 4.1.3.39 | EC 1.1.1.23                                  | EC 2.6.1.78  |
| EC 1.10.3.2                                | EC 1.1.1.35                                 | EC 4.1.3.4  | EC 1.1.1.3                                   | EC 2.6.1.79  |
| EC 1.11.1.13                               | EC 1.13.11.16                               | EC 4.2.1.17 | EC 1.1.1.85                                  | EC 2.6.1.83  |
| EC 1.11.1.14                               | EC 1.13.11.27                               | EC 4.2.1.18 | EC 1.1.1.86                                  | EC 2.6.1.9   |
| EC 1.13.11.2                               | EC 1.13.11.5                                | EC 4.2.1.22 | EC 1.1.1.87                                  | EC 2.7.1.39  |
| EC 1.14.99.54                              | EC 1.14.12.19                               | EC 4.2.1.49 | EC 1.1.1.95                                  | EC 2.7.2.11  |
| EC 1.14.99.56                              | EC 1.14.13.127                              | EC 4.2.1.80 | EC 1.17.1.8                                  | EC 2.7.2.124 |
| EC 1.6.5.5                                 | EC 1.14.13.149                              | EC 4.3.1.3  | EC 1.2.1.103                                 | EC 2.7.2.17  |
| EC 2.4.1.20                                | EC 1.2.1.10                                 | EC 5.2.1.2  | EC 1.2.1.106                                 | EC 2.7.2.19  |
| EC 3.1.1.3                                 | EC 1.2.1.16                                 | EC 5.3.3.18 | EC 1.2.1.11                                  | EC 2.7.2.4   |
| EC 3.1.1.72                                | EC 1.2.1.24                                 | EC 6.2.1.30 | EC 1.2.1.38                                  | EC 2.7.2.8   |
| EC 3.1.1.73                                | EC 1.2.1.31                                 | EC 6.4.1.4  | EC 1.2.1.41                                  | EC 3.1.3.15  |
| EC 3.1.6.7                                 | EC 1.2.1.79                                 |             | EC 1.2.1.95                                  | EC 3.1.3.3   |
| EC 3.2.1.139                               | EC 1.2.1.91                                 |             | EC 1.3.1.12                                  | EC 3.5.1.130 |
| EC 3.2.1.176                               | EC 1.2.4.4                                  |             | EC 1.3.1.13                                  | EC 3.5.1.132 |
| EC 3.2.1.203                               | EC 1.3.1.87                                 |             | EC 1.3.1.43                                  | EC 3.5.1.14  |
| EC 3.2.1.21                                | EC 1.3.8.4                                  |             | EC 1.3.1.78                                  | EC 3.5.1.16  |
| EC 3.2.1.37                                | EC 1.3.8.6                                  |             | EC 1.4.1.16                                  | EC 3.5.1.18  |
| EC 3.2.1.4                                 | EC 1.3.8.7                                  |             | EC 1.5.1.10                                  | EC 3.5.1.47  |
| EC 3.2.1.55                                | EC 1.4.1.1                                  |             | EC 1.5.1.2                                   | EC 3.5.4.19  |
| EC 3.2.1.72                                | EC 1.4.1.3                                  |             | EC 1.5.1.7                                   | EC 3.6.1.31  |
| EC 3.2.1.73                                | EC 1.4.1.5                                  |             | EC 2.1.1.13                                  | EC 4.1.1.20  |
| EC 3.2.1.74                                | EC 1.4.3.2                                  |             | EC 2.1.1.14                                  | EC 4.1.1.48  |
| EC 3.2.1.8                                 | EC 1.5.1.10                                 |             | EC 2.1.3.3                                   | EC 4.1.3.27  |
| EC 3.2.1.86                                | EC 1.5.1.7                                  |             | EC 2.1.3.9                                   | EC 4.2.1.108 |
| EC 3.2.1.91                                | EC 1.5.1.8                                  |             | EC 2.2.1.6                                   | EC 4.2.1.114 |
| EC 3.2.1.99                                | EC 1.5.1.9                                  |             | EC 2.3.1.1                                   | EC 4.2.1.19  |
|                                            | EC 1.8.1.4                                  |             | EC 2.3.1.117                                 | EC 4.2.1.20  |
|                                            | EC 2.1.1.37                                 |             | EC 2.3.1.178                                 | EC 4.2.1.22  |
|                                            | EC 2.1.2.5                                  |             | EC 2.3.1.30                                  | EC 4.2.1.33  |
|                                            | EC 2.3.1.168                                |             | EC 2.3.1.35                                  | EC 4.2.1.35  |
|                                            | EC 2.3.1.174                                |             | EC 2.3.1.46                                  | EC 4.2.1.36  |
|                                            | EC 2.3.1.233                                |             | EC 2.3.1.89                                  | EC 4.2.1.51  |
|                                            | EC 2.5.1.6                                  |             | EC 2.3.3.13                                  | EC 4.2.1.9   |
|                                            | EC 2.6.1.19                                 |             | EC 2.3.3.14                                  | EC 4.2.1.91  |
|                                            | EC 2.6.1.39                                 |             | EC 2.3.3.21                                  | EC 4.2.3.1   |
|                                            | EC 2.6.1.42                                 |             | EC 2.4.2.17                                  | EC 4.3.1.19  |
|                                            | EC 2.6.1.5                                  |             | EC 2.4.2.18                                  | EC 4.3.2.1   |
|                                            | EC 2.6.1.57                                 |             | EC 2.5.1.134                                 | EC 4.3.2.10  |
|                                            | EC 2.6.1.96                                 |             | EC 2.5.1.47                                  | EC 4.3.3.7   |
|                                            | EC 3.3.1.1                                  |             | EC 2.5.1.48                                  | EC 4.4.1.1   |
|                                            | EC 3.3.2.12                                 |             | EC 2.6.1.11                                  | EC 4.4.1.13  |
|                                            | EC 3.5.1.68                                 |             | EC 2.6.1.118                                 | EC 5.1.1.7   |
|                                            | EC 3.5.2.7                                  |             | EC 2.6.1.17                                  | EC 5.3.1.16  |
|                                            | EC 3.5.3.13                                 |             | EC 2.6.1.39                                  | EC 5.3.1.24  |
|                                            | EC 3.5.3.8                                  |             | EC 2.6.1.42                                  | EC 5.4.99.5  |
|                                            | EC 3.7.1.14                                 |             | EC 2.6.1.52                                  | EC 6.3.2.43  |
|                                            | EC 3.7.1.2                                  |             | EC 2.6.1.57                                  | EC 6.3.2.60  |
|                                            | EC 4.1.1.15                                 |             | EC 2.6.1.76                                  | EC 6.3.4.5   |

**Table S5. Comparison of amino acid abundance among different treatment group in mice**

|                             | Name            | Mean_LC  | Dev_LC   | Mean_LS  | Dev_LS   | T-test   | Mean_NC  | Dev_NC   | Mean_NS  | Dev_NS   | T-test   |
|-----------------------------|-----------------|----------|----------|----------|----------|----------|----------|----------|----------|----------|----------|
| Non-essential<br>amino-acid | L-Tyrosine      | 6.17E+10 | 6.80E+09 | 7.06E+10 | 1.04E+10 | 0.026853 | 5.89E+10 | 1.23E+10 | 6.27E+10 | 9.21E+09 | 0.397279 |
|                             | L-Histidine     | 3.90E+09 | 2.11E+09 | 5.62E+09 | 1.99E+09 | 0.062944 | 3.16E+09 | 1.82E+09 | 3.83E+09 | 2.46E+09 | 0.457338 |
|                             | L-Cysteine      | 2.96E+08 | 1.66E+08 | 1.77E+08 | 1.37E+08 | 0.081602 | 2.46E+08 | 1.46E+08 | 2.35E+08 | 1.59E+08 | 0.860349 |
|                             | L-Glutamic acid | 1.37E+10 | 3.26E+09 | 1.54E+10 | 4.18E+09 | 0.309275 | 1.17E+10 | 2.06E+09 | 1.42E+10 | 3.14E+09 | 0.032542 |
|                             | L-Asparagine    | 1.34E+07 | 6.65E+06 | 1.60E+07 | 7.36E+06 | 0.395013 | 9.60E+06 | 1.33E+06 | 1.02E+07 | 1.97E+06 | 0.372636 |
|                             | L-Arginine      | 2.95E+06 | 7.94E+05 | 3.50E+06 | 1.97E+06 | 0.405963 | 2.76E+06 | 1.04E+06 | 2.67E+06 | 9.24E+05 | 0.823397 |
|                             | L-Serine        | 1.42E+09 | 4.95E+08 | 1.53E+09 | 4.80E+08 | 0.584206 | 1.16E+09 | 1.99E+08 | 1.46E+09 | 4.95E+08 | 0.062174 |
|                             | L-Aspartic acid | 2.45E+09 | 8.92E+08 | 2.66E+09 | 9.58E+08 | 0.611999 | 2.06E+09 | 3.08E+08 | 2.52E+09 | 8.49E+08 | 0.089027 |
|                             | L-Ornithine     | 3.89E+07 | 4.14E+07 | 3.80E+07 | 5.06E+07 | 0.961997 | 1.50E+07 | 4.47E+06 | 2.31E+07 | 1.65E+07 | 0.114386 |
| NEAA Total                  | 8.35E+10        | 7.90E+09 | 9.61E+10 | 1.51E+10 | 0.023677 | 7.72E+10 | 1.53E+10 | 8.50E+10 | 1.34E+10 | 0.200999 |          |
| Essential<br>amino-acid     | L-Lysine        | 1.51E+06 | 4.55E+05 | 1.50E+06 | 6.66E+05 | 0.97829  | 1.43E+06 | 6.08E+05 | 1.50E+06 | 5.93E+05 | 0.766017 |
|                             | L-Valine        | 2.85E+10 | 5.33E+09 | 3.83E+10 | 1.37E+10 | 0.039086 | 2.63E+10 | 7.25E+09 | 3.12E+10 | 6.91E+09 | 0.101319 |
|                             | L-Threonine     | 5.30E+09 | 8.08E+08 | 5.86E+09 | 1.25E+09 | 0.22531  | 4.81E+09 | 7.92E+08 | 5.58E+09 | 1.12E+09 | 0.065288 |
|                             | L-Phenylalanine | 3.21E+09 | 1.48E+09 | 4.10E+09 | 1.85E+09 | 0.227666 | 2.61E+09 | 9.96E+08 | 3.04E+09 | 1.26E+09 | 0.366806 |
|                             | L-Tryptophan    | 4.13E+06 | 2.01E+06 | 4.49E+06 | 2.05E+06 | 0.683681 | 3.40E+06 | 1.13E+06 | 4.60E+06 | 3.55E+06 | 0.276671 |
| EAA Total                   | 3.71E+10        | 6.53E+09 | 4.83E+10 | 1.58E+10 | 0.041721 | 3.37E+10 | 8.65E+09 | 3.98E+10 | 8.18E+09 | 0.087694 |          |
